# Supplementary material for: Rapid identification of causative insertions underlying Medicago truncatula Tnt1 mutants defective in symbiotic nitrogen fixation from a forward genetic screen by whole genome sequencing
Source: PubMed Central journal article supplement (PMC4769575; doi:10.1186/s12864-016-2452-5), 2016-02-27
Supplement: 12864_2016_2452_MOESM1_ESM.pdf [file 12864_2016_2452_MOESM1_ESM.pdf]

**Additional file 1: List of sequences of all NF11217 flanking sequence tags (FSTs) obtained from R<sub>0</sub>, R<sub>1</sub> and BC<sub>1</sub>F<sub>2</sub> Generations by TAIL-PCR.**  
(Veerappan et al. 2015, submitted to BMC Genomics)

\*The signature refers to the *Tnt1* border sequence flanking *M. truncatula* genomic sequence and its location at the 5' or 3' end of the individual sequence, if listed.

**I. NF11217 TAIL-PCR FSTs (R<sub>0</sub> generation) obtained from *Tnt1* mutants database**  
(<http://medicago-mutant.noble.org/mutant/>)

>NF11217\_high\_1 signature: TGATGATGTCCAT 3' end  
CGTTCGAGTGAGATGAACGAGGGTAAGGTTATCTTGTGGTGCAGTGTTTTGAAGGGAAAATATAGCCGAGG  
GATACTTGAGGAGAGGCATTGTTGCTAAACCCTCAGATTATTTATTTGCAAAGTAATGGTTAGCACTTGG  
ACTAGTATTAGTCATTCTGAGTCGGTGTATGTGCGATCAGTTAATGTCTGGAGAAAACAAATCACAAATGA  
CAGGTGGCAACATTATTTTAGCTGATTGCATGGTGAAGTTACAGATGACATTAGAAAATGGATAATCTC  
TGATTTGGTTCGGTATGGAGATGGCAATTGGAAGGTGAATATTTTGTGGTGTAGATGTGAGAGTGTAGTG  
TAGCCAGGGAAATAGACTTGGGAATTTTTAGAGTCAAGTGCATATAACATGCATGCTACGAGGGTATCA  
TGACCATTTTCCAAGTTCAGTGTGGAGGAGAATGTGGAATATGGATGTTCTGGAATGAAAACAAATGCTT  
TATTTGGCATCAGTTATTAGCTAGGTTTGTGGAAATCACTTGGTTCCTATGCAAGTTTAGAGTGGATTG  
CTAATAATTTGAATGTTGATGTGTTTTAAACATTGGCTTTGCAAGTTGTTAGATCACCAAGCTTTAGGG  
TGTTTTAAAGGGGATTTCGGTTAATAGCCAAGGGGTTTGCAAATGGACTCTCTAATTGTGGTGTGGTGAGG  
AGTCTTAATGGGAAGGATGTTCCGAAGTATTGGTGGCAGGAGCTTGATCAGAAAAGATTTCGTCAATTTGATTT  
GTGAAAAGAGTGATGATGTCCAT

>NF11217\_high\_2 signature: TGATGATGTCCATCTCAT 3' end  
TGACATTTTATATTCTTCTAGTTTGAATCAGTCATACGTTTTAAGAATATGTTGCCGTCTTGGCCTT  
CCTAAAAAATGAGAGCAACACATAATCGTCTTTTTCCAAATCAAATAACGAATATGATTTTGTTCAA  
AAAAATAACGAATATGATCAAACACAACTACAATATAATTTTCAATCAATCTATAGTTTTTCTTTCTTA  
TATACGATAACAATTCAGCAGCGTAACCAACATATTTTCAATTACTTACTACAACAAAAAAGGTTAC  
AATAACATGGTTGATTACCAAGGTTACATCTTACTTTTTCATCATATGGCTAGTATCAACAATTTTGTAA  
AAGCCATACTACAAGAAAATACAAGAAATCGAAGTTACCTCCAAGTCCATTATCTTTACCAATCATTGG  
ACATCTTCACCTTATTGGTTCAATACCTCACCAAGGACTTCATAAACTTTCAACAAAATATGGACCTATA  
ATACACCTTTTCTAGGTTCCATGCCTTGTGTTGTAGCTTCCACACCAGAATCCGCTAAAGAGTTTCTTA  
AAACTCACGAAACCTATTTCTCCAACCGTCTCAAAGTTCAGCTGTTGATTATCTAACATATGGCTCACA  
AGATTTTCTTTGCTCCATATGGACCTTATTGGAATTTATCAAGAAAATATGCATGTCTGAACTTCTT  
GGTGGTAACACATGATGATGTCCATCTCAT

>NF11217\_high\_3 signature: ATGAGATGGACATCATCA 5' end  
ATGAGATGGACATCATCAAATCCCTCAACACTTGGCCAATTATTCTCCGTGTATATTTTCCATACTCCTT  
CCTCATTCCCAACTTTTCTGAAAAATGTTCTCTTAGGCCTATAAAAACTACCTTTTGTATCAATCAGATC  
CATATTCTCAGTTCATAACCAAAACGCCATTCTTCTTTTGTCTCTCCTCTCAAATTAAGTGAATGGC  
AACAAGAAAAAGCAAAGCCATAGGCATTGACCTTGGTACAAGCTACAGCTGCATTGCAGTGTGGCGAAAC  
AATCGTGTGAGATCATTCCAACGACCAAGGGAACCGTGTCAACCCCTTCTTACGTTGCCTTCAACGACA  
CTGAAAGATTAATAGGCGATGCTGCCAAAACCAATTAGCCAAAATCCCCACAACACTGTTTTTGTATGC  
CAAACGTCTGATTGGCCGTGATTCTCTGACCAAAACAGTCCAACAAGACATAAAGCTTTGGCCTTTTAAA  
GTTGTTCCGAACCACAAAGACAAACCCATGATTGTTGTCAATTACAAAGGCCAAGAGAAACATTTTTTAC  
CTCAAGAGATATCTTCCATGGTGTGTCTAAGTTAAAGGAAGTTGCTGAAACTTATTTGGGTCATGAAGT  
GAACAATGCTGTTATCTCTGCTCCTCCTCA

>NF11217\_high\_4 signature: TGATGATGTCCATCTCA 3' end  
AACCTAGAGTTTCTTGCTGATCAAAAGGATAGATTGGCACTTAACAAATTTACTAGTGGTGAATGTGAAA  
TTGGAGTCTTGAAATTGTTAAGAGAATTTAGAGCTGTATCGAAAAGTTGTAATGACATATTTGTTGGTAA  
AGATGGTAGAGTCATCCCCGGATATTACCAACTGCACCTTTGATGGATAAATCTGCGGCGTATGGTAGG  
GAGCATGAGATAGAGGAAATGACTGAATTTTTACTTTTCAAGACAGTTACAACCGGCTATCTGTAATCAGTA  
TAGTGGGTCTGAAGGGGATGGGTAAGACAGCCCTTGCCAGCTTGTTTACAATGACCACAGGATACAGGA

GCAGTTTGAATTTAGATCCTGGGTCCATGTTTTCTGAATCTTTTGACTGTCTTCGTCTCATGAAAGAAATA  
CGCGATCTTCAACCGCAACATTGGCAAGCAGGGAGTGAATATTTACTTGTCTGGATGATGTCTGTATTA  
AAAATAGTTATTATATGTCTGGAGTATTTACTACCTCTTTGTAACCAGGGATCTTTTCGAGGCAAGATAAT  
TGTGACGACAAATGATAAAGCAGTAGCATCAGTCATGAGATCGACCCAGATAATTTATTTAAGGCAATTG  
GAGAAGAGTTGATGATGTCCATCTCA

>NF11217\_high\_5 signature: TGATGATGTCCATCTCAT 3' end  
TCTTGAGGAGGAGCAGAGAATATGTGGGATGACATGTAGAAACCCAACAAAGACCCTACTGATGCTAATA  
GTTGATCGTTCCTGTGTGTGTGGAAACGCGATTCACTTTGGTTGTAATTGCTAATTAACCATTTGTAACG  
AAGGGAACGTGATTTGTTTGTATTATTATGTATTTTTATTAATAAATATTTGTTTTTAAATTTAAAT  
CTGCCACATGTCTTACATCCAACTCTAAATGGAGTAAATAGAGTTTTCCTAAATGGAGCATGCCCGAC  
TCCAATACGCCAACCCAAAATAGTCATAGTGAACAACAGGAGAAAGAAATAAAGTAGAATCAACCGGA  
GTACAATACGTTCAATCACATATGGTTCCTAACCCAACCACACCCTATACCCTCCATGGATACAATCACC  
AAAAAATTATACAACAATGTAGATTTTGGATGACCTATTTTTCAAATTTAATTTCCCAATTTTTTAAAT  
GATTGAACTTTTCCCATACATTTTGGAGCTGAATTTTAGGGAAGCTTTAAGTTATACCGTATGAAGGAA  
GGAACCTTGATGATGTCCATCTCAT

>NF11217\_high\_6 signature: TGAGATGGACATCATCA 5' end  
TGAGATGGACATCATCATGTAACCTACCATGACAGAGCTAGTGTGTGGCATATTAATTTAGTGACCATGT  
TTTCTGTCTCTAAAAAATATTTCTTCTTCTACTAATCTCCTACAGTGAGGTAAATATAATTTCTCTTGG  
ACCAAGCATAATCCCCTTATGTTAAATTTTTTCTTATAACAAAAAATTAATCAAAGAATGGCAAAGTG  
GAAGATGAAAGGAAAAAGCAGGAAAGAACAAGGGAACAGTTAGCTACTATACATTTATGTTAAAGTGGT  
GAGCTTTCTTCTGCTGTTCCCTAGTTATGTAGGCTTCAATATGAAAAATATGATGTGTCTCTCAACT  
CAACCATCTAGAATCTAGCTTTGTCCAGTGCTATGAGTACTTTGCTGGATTGAGATTTAAATGTAGTGGA  
CCATTAGTTTAAATCTTCCCCTATGTCTAACTCCAAGCTTATTCATATACGGGTAGCATTTTGGTGATAT  
AGAATTGGTGATATTGGTGACATTTGAGGTTGGCCTGTGATTGGTTTGGGATCTTGGAGTTTGTCTCTC

>NF11217\_high\_7 signature: No signature  
TCATCAACTGCTAACTATGCACAAGTTGAACATGGAGTTTCTCGAAAAGCAATAGAACCAAGTTACAAAA  
TAATAACAAGAAAACCTACAATACGATATTGATGTATAGTGAAGTCCTTAATATTATTGAGATTACATC  
TCTTTGAATACAATTGTACATAAGTAGTTTACAAATATTGATGTATAGTGTACCTTCAAGATGACAA  
CCTCTTTATATTATAGGTTTCGATTCCTTTAAAGTAAATAGGTCTTCTGGTTGAGACTAATTCTAAGAGAA  
TGTCTACTTGGAAACCTTTGTTGGATAATCAGGTAACACTTTTAAAGCTCGTCGAGTAATAGATTGCCAGT  
TTGGGTGGAAGTGTGATTTTTTTTTAAAGGGACCTTTGTGGAATGATATCTAGTTGAGTGTACTCCTTTG  
AGGATTTGTTACCCCATGCTCTTTTAGGTCTCTATTCAATAAAAATAAAGTGATTGGTATGACTTTGAGA  
GAGGGATATGGGTGGGTTTGGGATCTTAAGTGAATCGC

>NF11217\_high\_8 signature: No signature  
TCAATGAGATGGACATCATCAGCGTCGACATTGCAATCCACTTCACTGGCTACCAGTCTAATCCACCCTT  
CTTGACTATGATCTGTCAATTTCCAATGTTGGTATTCTCCTGGTTCTCTCCATTCTCAGACATACGCGG  
ACCTACTGCCACTGAAGTAAGACATCACGCACCATACACACTGAGATACATGGTTGTGTTTCGACGTCAT  
TCCACAACCTTGTCTGTTTTGTCTGTTCCAGATGCATCAAAGGGTCAGTACGAAATCAAAGAGTTGTTGGTG  
TTGTAGAGATTCTACTAACTGAAAGTAAAGAGCTACAAAACCATATGTCGTATCCAAGTTGTCTTGAATA  
ATGTTCTATAGACCTGCTACACTTCACACCTCCTCTAGTTTTGCACATCCGAAAAAGACATGTCATTCAT  
TCTCATATGAGCTTTCACAAGGCACACAACAATCACAACAATGTACCCCGTGAGTTTAAAGCCCGTGTCT  
CGTGGGTAAATACCTCTTCTCTGCTCCTCCTCA

>NF11217\_high\_9 signature: TGATGATGTCCATCTCA 3' end  
TGAGCTTGGTTCTAAATATTGTGTGTTATGTAGGTAAACAGTTTGTAAAGCACCACATGGTCTTCTCT  
TTAAGGTAATAGACGTATTCTAGATATTCTGCTTTAAGTGATCAACAAATCCTAAGCACCACAAACAATTAT  
TCGTTTTATTCTTGACTTCATTTTGGATAGTATATAATATGCACACTTTTGAACCGTTAGAGGATAAAATA  
TCTTTTTGTTATCATCAAAATTCGAAGATAACCCATATTTTGAATCTAACCATATTAACATGGTATACAT  
TCAATCTAACATTACATTCTTGTAGATGAAACTCATATGGGTTACTCCACTCTATGTAGGCACCATTT  
AAAAAGTGTGAGATTTAAATTAATTTTATCCAATAAAAAAGTGTAGATATCGTATTTAAAGAGAGTGT  
TCATAACACTTCTCATTTTTTATGATAATGATATATCTGACGGAAACCTTGCTCACATGAGCATCACACCT  
GATGATGTCCATCTCA

>NF11217\_high\_10 signature: TGATGATGTCCATCTC 3' end  
GTCGAGTGAGATGAATAAAGGATCACTTAAATTAGTACGGAGAGAGTATTAATAAACAATGGGTGCTCGT  
GTTTTTTTTTAAATAGTAGTATAGTAGAAATTCATCATTTTATATTCAATCATGTTTTTTAAACTAATGGTC  
ATTCACAATGGAGTTTTGACAATGGTTTTGGAAAAAAGGAAGGAATGAATGGAAGAAATATATGACATTG  
AGAGGGGAAAATATTGGGGTTTTCATTTTCTTCATAATACAAAGCCCTCATCATTTGAGGGAACTAAAAT  
ATTGTATTATTGAGGAGGATTTTGCAGGGTTTACATGAATTTTTTAAATTTAATCTAACAGTTATAATA  
TTCTTAAAATTAATAATATATTAATCATAAGCATTAACTTATCATTCTCTAAAAATTAATCTATAAAAA  
AAATACGAAAGATTTTACTATTTTCCCCTATATTTGATGATGTCCATCTC

>NF11217\_high\_11 signature: TGAGATGGACATCATCA 5' end  
TGAGATGGACATCATCAGATTCAAGAACAATCAACCAATGTAAGCATTATATTTAGCTATACACTTCAT  
TACATATAAATCAACTGATATCCATGCCGAGCTGAAATCCTAAGGATACTCTTTTTCTGTGTGAGTATAG  
TAACCGGTGTCCGTGTCCGTGTGAGTCCCTTCATAATATTGATTTTGTAAATGATAAATGACTACAGGAA  
GGGCTTGAAACTGAGATAAACCTTGGAAAGCCAAGCTAGTTGGTGGAAAGCAACTCAAAACACTGACAAGGA  
GATCATTTTGTGAACATGTGTAGAGATGTTGGTTACTACTGGCTGAGGATTATGATCTATATCATTGTATC  
TATATGTGTTGGAACCATCTATTTTGTGTTGGCTACGGCTACACTTCCATCTTGGCTCGTGGTGCCTGT  
GGTGCATTTATATCAGGATTTATGACTTTCATCTCACTCGACC

>NF11217\_high\_12 signature: AGATGGACATCATCA 5' end  
AGATGGACATCATCAGTTTGAACCCATATCTCAATGTTAAAAGTAAGAAGTAAAGGTGTTAGCAGCCAAC  
ACTCGGTGGATTTAGTCCACATCGGATAGATAGGATTCTTGAGAAGAGTTTATAAGGAGTATGAGTTAG  
GCCTGGATTTACGTGACATAAGGAACCTACAAATTATATGTGTGTGTCCTCCACAAGACAGAACACTATCC  
TATATATCTAAAGAAGTTAGCAAACCTTGGCCGAAACTTTACGCCAAGCTTTAATTGAGAATATTCTAGA  
CAACCAAATCCAAATCAGATAACTAAGTGTTAATGGGTTAGGATTTTCAATTTTCTACTTTGTTAAACCC  
AATGTGACGGGACTTGGGTATTATGGGCTGCCCAAGTTCACATCGAGTAGTATGGAACGTTCCGTGAG  
TAGCTTAGTTCTTCCCCTTTGCTTCTCC

>NF11217\_high\_13 signature: TGAGATGGACATCATCA 5' end  
TGAGATGGACATCATATATATTTTAGATCGAATTTACAATATAAAAATTTCTTCTACTATGGAGAATTGGA  
AAATATTATAATCAATCTATAATATCACATAGATATATTAATAAATAAATAACTGACCATTTCCATTGATCA  
CCATTGAGACTTATATACTTTCATCTATTATTTTATAATACAACTTGCAATGTCATGCATAATAGAATTTA  
GGCTTAAATAAGAAAAGGTTTCATGTAAGTTTCGCGCATTTTTTTGTTTTAGTTATTGTATCTTTTTTTGTT  
GCGAAACAACCCCTGTATTTACTTAAATTTTTGACATTCGTCCTGCCGTCCATTTCCGTAAAAAAAAC  
GCTTCTCTGGCTAACGGACTAATATGTGGCATATGATGAGCTGACAATTGGCTATTAGAGGGACTAAAAC  
CAAAAATGCAAATTTACATAGGGAC

>NF11217\_high\_14 signature: TGATGATGTCCATCT 3' end  
TGAGGAGGAGCAGAGAAGTTGTGGTCACATAAGATGGTTGGATTAGTATTTGGATGTGCTTTCCTGTCCT  
TGCTGTTCTAGATCGATACCTCTGTCTTCTCTTCCAGAAGCTCAGATTGTTATTTTTACCTCTATATATTAT  
TATTATTTTCTCGATGTGATATGGGAGTTTATTACTACATACATTGTTTGCATTCTTGAGACATTCATTT  
CAGGGGAGGTTTTGTATTAATTGAGGACACTTATTTTGTATCTCACTATTACTATTATAGTTTATCCATC  
ATTCGTTGTTTTCTTTGAATATTTTATTGATTACATTTTTCTGTTAATTCTTCTAATCCTAACTTTTTCAG  
CCAATGTTTCTATTTCTATTTACATTCACGTAGTTCTGTAAGTTAGGGAGACTCTACAACAGGAACCATT  
AGATTTGATGATGTCCATCT

>NF11217\_high\_15 signature: TGATGATGTCCATCTCAT 3' end  
CTAGTGGAGAAGCAGAGATAAACGGATTGACCATTTGGGATGTTAAAGAACGAATGCAAAAACAACAAAAT  
TATAAATTGAAAAGTTATGTGGTCAAATTTAATATGAACATTCTTTTATTACTTTTATCTTGCAATATGGA  
AAACGAACAATCATGAGTGTATTTTTCTAAAACCTGAGAATGAATTTACGAAATATTGTTTATATCTTC  
TTCGTAGTTATTTTATAAAGTAATAAAAATAATTATGTTTAAATAATAGGTAAAGTGAATCATAGTATCA  
AGTTTTACTTTAGAAAATATTATTTTTAATTTGATAAGTTGAACAATATGGGGTGGTAAAGTGGTTTTGT  
TTTTCTTAAATGATTTTTTAAAATTTTTAATATCAGCTACAATCATAAGAATTCATGATGATGTCCATCTCA  
T

>NF11217\_high\_16 signature: TGATGATGTCCATCTC 3' end  
GTCGAGTGAGATGAAACTCATGCAAAGGCCAAGAATGTATACTGAAATTTTCTCAATGTCATCTTTCAAG

TCCTCAGAAAGGCCAAGAATGCATACCTTTTGGATTGTGATAGTGATATCATTTGTATCAGATAGCCATG  
GTGAGGGGAGGAGAAGAAATGAGAAATGTGGTAGCTGTAGTCGATCATAATGGGAGTAATGAGATTTATAT  
ATACCATTTCTTTTAAGGAAGTGACAAAAAACTTTGAGAGTGTGTTTGGATGAGGGAATATTTTGGGC  
AATGTAATGTTTTGAGGGAATTC AATTATTTTGGAGTGGATTCAAACAATAGAATTCACCTCAAAGTAAT  
TGAATTCGCTCAAAACATTACATTCCTCAAACCTGATGATGTCCATCTC

>NF11217\_high\_17 signature: TGATGATGTCCATCTCA 3' end  
AGATGGACATCATCAAATAAAACAACATTAACCACCTTTTTCTTGAATCAAACCTATGGTATCATTGCTC  
AATGCTTGAACCTTAAGAATTTTATTGTACCATTTAAACCAGATCTGATGTCTTTGAAAACCTTTGTGGCA  
CAACAGTATCGTTTTCTTGCTGACAGATCGGGAGTTTGTATTTGGACTTAAATATTCGATTCGCCTCCAAA  
AGTCTTCAAGAACACTGCTGCACACATATGCAGGACTAGGAGGTACCTCAGTGTAGTTCTCCTAAAGAGC  
ATGTAGCAGAAAATCAAATGACCGTTTATACAACACCTCTGTATGAAATATAAAGGTCATCATGGTCAAC  
AGGCAAAAATAGTATGAACGAATTGATGATGTCCATCTCA

>NF11217\_high\_18 signature: TGATGATGTCCATCTCATT 3' end  
TGAGGAGGAGCAGAGACAGGCAAATTTGCAGACTTTCTTTGAGAAGGCTCTTCAGGATTCTTTTTATTGTG  
GAACTTCTTTCCCGCAAATCGAATCCATGGATTTGGCATCTGATAATAAGAAAAGGCGATTGTCTCAGG  
TTGATCGCATAACAGCCTGTTGTCGAAGGTATTTTGTCTTGACAATCCTTGCAGTTTCATACTCGAATTTGG  
TAATGTTTTCTATCAAGATATCTCAAATAAACTAAGATTAGAATTATCACTAGCTGACTTAGATATGAAC  
TTGATATCAGGTAGCACACAGGGTTCAAATGAAGATGAGGATGATGATGTCCATCTCATT

>NF11217\_high\_19 signature: TGATGATGTCCATCTCAT 3' end  
TGAGGAGGAGCAGACTTGCATCTGAACGACGAGTGGGTCCACCAATACCTAACAGAAAAGTTCAATAT  
GCTGATCTTCATATAGATAAGCGTACAAGAGAGTCACCCTGTAATGATTTATCTGCTACCAAATCTGTAC  
CTGTTGCTGTTTTCAGGTAGGATACTTTTCTAGTTATAATGGACTTTTTCGAATTGTCTCTGTTTTTTTTCT  
CGTAGCATCTCAATATATATGTGGTAAAGCATCTTGGTATGAATTGTGATATTGTCATTTGAGCCTGTCA  
GATTTGAACCAATCATCTCTAATCTTATTGATGATGTCCATCTCAT

>NF11217\_high\_20 signature: TGATGATGTCCATCTC 3' end  
GTCAGATTTTTGTGGGTGTCAAGGGGTGTTTATGTATCATAACTCTTAAAAAAAACGAACCTTCCAA  
CCCCACGACACCTATAAATTAGCCAGAAGCAGTCATGCGAGGCAACACTAACATCAGCTGAAACAAAGAAG  
ACATAACAAGGTAAACTTGATATTCTGAACCTTTCTATTATGAAATTCTCTTCCAATTTCTACTCATATC  
TTTTATTCTTCCCTTTATATTTTGTAGATTATTTATTATATACTGTTTCAAGTTGATGTTCAATGATGGGA  
GCAAGACTAAATTGTATATCTTGTGATGATGTCCATCTC

>NF11217\_high\_21 signature: TGATGATGTCCATCTC 3' end  
TGAGGAGGAGCAGAGAGCTCTGTTGCTGTAGTGTCTGAGCCACAAAATGCCGTCCAATCATTTACTAC  
CATGCCAGATGCTATTACTTCACTACCGCGATTGACAGTCCCTGCAACCAACGGAATTTGAAGAAGTGTA  
GAGAGTTCATCCAAGTCTTCAACAGAAGTATGAGGGTGGACCTGCATTGAGTGTATATGATCAAAAGATA  
GAACATTTATTCAAGTTGAAACATTCAAAAGGACATGTCTTGACCTACCAAACCACCTCTGTTGGACAG  
AGCACAGTAACTGCCAGAAAGTGATGATGTCCATCTC

>NF11217\_high\_22 signature: TGATGATGTCCATCTC 3' end  
AAACTACTATATTCAAGCTGCAAGAACATTGATCATGTTATATCGCTATTTATTTTTATTTTTTTGCCAC  
ATTAGAGTGATGTTGTGGAAAGTTCTTGTCCAGCTTAAACATTTTTTTGCTTTTTTCAGACGATCTAAGCC  
CTTTTTAAACAATCACTTTCCACGTTTTGGCTTAGGCGTACTATGCAGTTTCTCAAAGAGGTTTAAATCAA  
AGTTTTGGTAGTGCCTATAAATGGATAAGATCATTAAAGCAAATTGTCAACTTTTTTTTTCTGAACTTTTTCA  
AAAGTGATGATGTCCATCTC

>NF11217\_high\_23 signature: AATGAGATGGACATCATCA 5' end  
AATGAGATGGACATCATCAGTTGATAGAGTGTTCATCGAGGCCACAGAAGAAATCAACTGCACATCACAT  
GAAGACGAGGCCAGAAAATCATCACTGTCAGATAGGAATCGGAAACCAACAGAGTATGCTCCGTTGCCA  
CCACTGCCTCCTGATTTTACAATTGTCATTTCTGCTGATGCATCTTCAACGGCTACTGTTGTTCCCTCCAC  
CCCCTACTCCTTCTACTTGTTCGGTACTTTTTTTTTATTTTTATTTTTATTTTTAAAGTATCTGTGCTGCTC  
CTCAAGAT

>NF11217\_high\_24 signature: TGATGATGTCCATCTCATT 3' end  
AAAAGAGGTAAAACCTGCATTTTTATGACCGTGTTTCAGTTTAGTTTCATGTTGTAGCAGTTTAGATTGTAAA  
TGTGAAAGCTGGTGTAGTTTTTCATAATCCACTAGTAGCCTTGTCTCTAATAGTTTTCAAAGACTGCTTC  
ATCTAGAATTATTTCTTACTGATATAACTCTTGAAACTTAGGTTACGAAAAGGCATGCAAATCTGTTAA  
ATTTTAAACAAGTCTTGCTTGTGTTTTGTTATGCCCTGAGGTTGTAGGACTTTATTGATGATGTCCATCTCA  
TT

>NF11217\_high\_25 signature: No signature  
TGAGGAGGAGCACAGACACAACCTTTACCAACTTTTTCTTAGTGAGAGAGGAGAGTCAATTCAATATGG  
TGCAAGGCTTAATTTTGAAGGGGTTCAAGACAATGAAAATATAGTAAAATAGGTGTAAATATGAAAAGTT  
GAGAAGGTGCAATTGAACCCCTGGCCACAACGTGGCTCCGACAATGTGTCTAATATAAATCCCGACATTT  
TTTTGATTAATAATAGGTTATCAATCATGGTCTCTCGTTGGATGAAATGAAGGAAGCAATGAGTGTGTTT

>NF11217\_high\_26 signature: ATGAGATGGACATCATCA 5' end  
ATGAGATGGACATCATCATAACTAAATAAATTACATATAATGGAGAGAACCCTATAAAAAAATACCGTAA  
CTTATTTGATCATATACTCTAAAAGACATTTATTCCTTCTCAAATTTTTTTTTTTGGTACATCCTTCTCA  
ATATTGTTATTAGTTATAAGGTGCAAAGAGAGTTAACTAGTAAAATTAATTAAGAAAATTGCATCAGTTA  
GCTGATTGCTGATTATATGGTGTACTATTAATATTCACCTTCATCCTTTGCTTCTCCTCT

>NF11217\_high\_27 signature: No signature  
ATTCCTCCAACCTACCCATTGCATAAGGATGATAAGTAACCCTAGTACCCTTTTCACTTTTGTACCATC  
TGGTAAAACATCATCATCAAACAAAACCTTTGAATCAAATTGAATTGGTGGATATAGTCTCATACTTTCA  
TGTGCTGCTGCTTGTAAATAATGCAATTTCTTAAGTTGTTCAAATTCGTTACACCAAAAATATTGTTTT  
CATCATCATGTGGTCCAATTACTCTCTCTGCTTCTCCACT

>NF11217\_high\_28 signature: No signature  
CTGAAAGTAAAATTTGATTATTTCTCTTTCTCACGTTCTCTACCATATATGATAGATTCATCCATGAA  
TGATGAAGTCGCAAAATCATTGGCTCCATTGTCAAATAAAGTAAATCAACAAGTTTCAATCTAGAT  
TTTTCTTTGCAAGAACTCTAGCCTCCTGACCAATACTTTAATCCTAGATTGAAATCGATTGATAGAAG  
CTGAAAGAAAGCATTGTATCTTTCCCTTTGCTTCTCCTCT

>NF11217\_high\_29 signature: No signature  
TAACACACACTAAGTTTGGATGAAATCATGGTGGATTCTGGGATTCTTTTGAAGCTCGAAGTGTAATTTTT  
GCTAAATTTGCGGCGACACATTGCACTAAGTTTACGAAATCAATGTGGTAATTGAGATTTTGTGAAAGT  
TTCAAAGTGCAGTTTTTTGCTAAAATCACGGTGGCACAACCTTAAATATTCCAAACACACAACCTCCAATGT  
TTGGTATTCCTTTCTCACGTCCCTATGCTACTCCACT

>NF11217\_high\_30 signature: No signature  
TAACTGATTAAATAATATGCAATTCATTTCGCACTTCTTAGTCTATAAGGTCTAACTCAATCAATAAAAT  
CTCAAATTTGTTATACCGAATATTGTGACTGCAGTTTAAAACCTCAGTTACTCCACTTATGTGTGTGAGT  
TTTCGATGGATATTGTCATGTTGTCTATCTACCCAAAAAATTTTCGCACTTTAGACCGTGTAAAA  
ATATTTGCGTTAGAGAATGATGTCCATCTCATTGC

>NF11217\_high\_31 signature: TGATGATGTCCATCTC 3' end  
AGGGTTTGTATTGGTAAAGAAATGGCTTTGATGGAACCTAAAAGTGTGGCAATTTCTTTGCTTAGAAAGT  
TTCATATTGAATTGGAATGGAAGATAGAACAATGTTTCATGGTAACCCAAGATTCTCTCCTGGACTAAC  
TGCCACTTTTGCTTTTGGTCTTCTGTATTTGTTTCGTTCCAAGAGGAACCAAGTGAATAATCCGTACTACT  
ATATATATGTATCTGATGATGTCCATCTC

>NF11217\_high\_32 signature: No signature  
AGAGAAGCTCAAACGACTATGGTAGAAGATCTGAAGAAAGGTCAACCATAAGTCAACATATTGAATCAGA  
AGAAAATGACGTCTCTTAGAAGCTGAAGATTTGCTTCTATTAGACTATGTGGAGATCATCAGACTCAGACG  
ACCTAGCAGACGCAGAAGACCCCATCAAACCTTGAAGACCTTCAGACTTTAGAAGCACTCGAGGGACCCA  
AACTCCATGTCAAATTTGTGCTGTC

>NF11217\_high\_33 signature: AATGAGATGGACATCATCA 5' end  
AATGAGATGGACATCATCAGATCTGCCATGTCCTTTGCGCGTGTGTTATTCAATTTTTGCCGTGAGCTCAAC

TGCTACTGTGATTTTCTTGATTGATACTCATACATTCTTTATCAAAGTAGAGTCATTTAAAATCTTATTA  
TCTGCATATGATTTGTATTTTTATCTACATGTATTAACACTTGAGTTTTCCCATAAAAACAATCTCTTCT  
GTGCTCCTCCTCAAGATC

>NF11217\_high\_34 signature: TGATGATGTCCATCTC 3' end  
AGGTATGAGACTGCATGGTTGAAGGAAGGCTTATAAGAATTGTTTGGTACTACCTATATCAACATGATGC  
ATCTTCTTTTCGGTAGCACATTTTCATAAGAACTCCACAATTACGCGTGTCTTGACTTGGAGAAAATTTGGG  
ATGTGTGACCTACCGAGAAGTTTCCCGGTAAGCATGCGTGTGAAAAGACTCGTGTGGTTTATAGGTGAT  
GATGTCCATCTC

>NF11217\_high\_35 signature: TGAGATGGACATCATCA 5' end  
TGAGATGGACATCATCAAAATGTAGTTGGCATTGGCAATTTTTTAAGGGTTTCCAAGTACTCAACCTT  
CATTTTTAACACATTTCTCTTTTTTACTCCTAAAGAAATTCTAGCATCTCTAGCAATTTTCTTTTCTTA  
GTTTTCAAATGGACTGGTAAAAGCTGAGAAGCTTACTACCTTGCTAGTAGTACATTCAACTTCTCTGCTCC  
TCCTCAAGA

>NF11217\_high\_36 signature: TGATGATGTCCATCTCATT 3' end  
CGATCTTGAGGAGGAGCACAGAAGGAACAACAATTCATGAAAAAGAAAATCAATTTTCATGGACAAAAGAT  
AATGAAGAAAAACACCCAAATTCAAATTTTACAAAGAATCAATTCAGAAAAGATGTTAGGGGAACCTTC  
GTCTTTTTTGACCAAAATTTATGTCATTCTCTCGCTTTTTTTCAGTGATGATGTCCATCTCATT

>NF11217\_high\_37 signature: TGATGATGTCCATCTC 3' end  
ATCTAGTGGAGTAGCAAAGGTAGTATAAATACAAACATGTTTTCTCATTCCATATTCATTTTCTTTTCC  
ACAAAGAAACATCAATACAACAAGTTTTTTTTCCATTCATCATTCTTTAATTCTTTTCATTATATTCTATTC  
TACACTTCATTTAGTTTATTGTTTGGGTTCAATTCATAATAACATTTGATGATGTCCATCTC

>NF11217\_low\_1 signature: TGATGATGTCCAT 3' end  
CGTCGAGTGAGATGAACGAGGGTAAGGTTATCTTGTGGTGCAGTGTTTTGAAGGGAAAATATAGCCGAGG  
GATACTTGAGGAGAGGCATTGTTGCTAAACCCTCAGATTATTTATTTGCAAAGTAATGGTTAGCACTTGG  
ACTAGTATTAGTCATTCTGAGTCGGTGTGCGATCAGTTAATGTCTGGAGAAAACAAATCACAAATGA  
CAGGTGGCAACATTATTTTAGCTGATTGCATGGTGCAGTTTACGATGACATTAGAAAATGGATAATCTC  
TGATTTGGTTCGGTATGGAGATGGCAATTGGAAGGTGAATATTTTGTAGTGTAGATGTGAGAGTGTAGTG  
TAGCCAGGGAAAATAGACTTGGGAATTTTTTTCAGAGTCAAGTGCATATAACATGCATGCTACGAGGGTATCA  
TGACCATTTTCCAAGTTTCAGTGTGGAGGAGAATGTGGAATATGGATGTTCTGGAATGAAAACAAATGCTT  
TATTTGGCATCAGTTATTAGCTAGGTTTGTGTTGGAATCACTTGGTTCCTATGCAAGTTTLAGAGTGGATTG  
CTAATAATTTGAATGTTGATGTGTTTTTAAACATTGGCTTTGCAAGTTGTTAGATCACCAAGCTTTAGGG  
TGTTTTAAAGGGGATTCGGTTAATAGCCAAGGGGTTTTGCAAATGGACTCTCTAATTGTGGTGTGGTGGAGG  
AGTCTTAATGGGAAGGATGTTTCCAAGTATTGGTGGCAGGAGCTTGATCAGAAAAGATTTCGTCAATTTGATTT  
GTGAAAAGAGTGATGATGTCCAT

>NF11217\_low\_10 signature: TGATGATGTCCATCTC 3' end  
GTCGAGTGAGATGAATAAAGGATCACTTAAATTAGTACGGAGAGAGTATTAATAAACAATGGGTGCTCGT  
GTTTTTTTTTAAATAGTAGTATAGTAGAAATTCATCATTATATTCAATCATGTTTTTTTTAAACTAATGGTC  
ATTCACAATGGAGTTTGACAATGGTTTTGGAAAAAAGGAAGGAATGAATGGAAGAAATATATGACATTG  
AGAGGGGAAAATATTGGGGTTTTCATTTTTCTTCATAATACAAAGCCCTCATCATTGAGGGAACTAAAAT  
ATTGTATTATTGAGGAGGATTTTGCAGGGTTTTACATGAATTTTTTAAATTTAATCTAACCAGTTATAATA  
TTCTTAAAATTTAAAATATATTAATCATAAGCATTAACTTATCATTCTCTAAAAAATTAATCTATAAAAA  
AAATACGAAAGATTTTACTATTTTTCCCTATATTTGATGATGTCCATCTC

>NF11217\_low\_11 signature: TGAGATGGACATCATCA 5' end  
TGAGATGGACATCATCAGATTCAAGAACAATCAACCAATGTAAGCATTATATTTAGCTATACACTTCAT  
TACATATAATTTCAACTGATATCCATGCCGAGCTGAAATCCTAAGGATACTCTTTTTCTGTGTGATATAG  
TAACCGGTGTCCGTGTCCGTGTGATCCTTCATAATATTGATTTTGTAAATGATAAATGTACTACAGGAA  
GGGCTTGAAACTGAGATAAACCTTGGAAAGCCAAGCTAGTTGGTGGAAAGCAACTCAAAACACTGACAAGGA  
GATCATTGTGAACATGTGTAGAGATGTTGGTTACTACTGGCTGAGGATTATGATCTATATCATTGTATC  
TATATGTGTTGGAACCATCTATTTTGTGTTGGCTACGGCTACACTTCCATCTTGGCTCGTGGTGCCTGT

GGTGCATTTATATCAGGATTTATGACTTTTCATCTCACTCGACC

>NF11217\_low\_12 signature: AGATGGACATCATCA 5' end  
AGATGGACATCATCAGTTTGAACCCATATCTCAATGTTAAAAGTAAGAAGCTTAAGGTGTTAGCAGCCAAC  
ACTCGGTGGATTTAGTCCCACATCGGATAGATAGGATTCTTGAGAAGAGTTTATAAGGAGTATGAGTTAG  
GCCTGGATTTACGTGACATAAGGAACCTACAAATTATATGTGTGTGTCCCCACAAGACAGAACACTATCC  
TATATATCTAAAGAAGTTAGCAAACCTTTGCCGGAAACTTTACGCCAAGCTTTAATTGAGAATATTCTAGA  
CAACCAAATCCAAATCAGATAACTAAGTGTTAATGGGTTAGGATTTTCAATTTTCTACTTTGTTTAAACCC  
AATGTGACGGGGACTTGGGTATTATGGGCTGCCCAAGTTCCACATCGAGTAGTATGGAACGTTCCGTGAG  
TAGCTTAGTTCTTCCCCTTTGCTTCTCC

>NF11217\_low\_13 signature: TGAGATGGACATCATCA 5' end  
TGAGATGGACATCATCATATATTTTATGATCGAATTTACAATATAAAAATTCTTCTACTATGGAGAATTGGA  
AAATATTATAATCAATCTATAATATCACATAGATATATTAATAAATAACTGACCATTTCCATTGATCA  
CCATTGAGACTTATATACTTTCATCTATTATTTTATAATAACAATTGCAATGTCATGCATAATAGAATTTA  
GGCTTAAATAAGAAAAGGTTTCATGTAAGTTCGCGCATTTTTTTGTGTTTATGTTATTGTATCTTTTTTTGTT  
GCGAAACAACCCCTGTATTTACTTAAATATTTTACATTTCGTCCTGCCGTCCATTTCCGTAAAAAAAAC  
GCTTCTCTGGCTAACGGACTAATATGTGGCATATGATGAGCTGACAATTGGCTATTAGAGGGACTAAAAC  
CAAAAATGCAAATTTACATAGGGAC

>NF11217\_low\_14 signature: TGATGATGTCCATCT 3' end  
TGAGGAGGAGCAGAGAAGTTGTGGTCACATAAGATGGTTGGATTAGTATTTGGATGTGCTTTCCCTGTCCT  
TGCTGTTCTAGATCGATACCTCTGTCTTCTTTCAGAACTCAGATTGTTATTTTTACCTCTATATATTAT  
TATTATTTTCTCGATGTGATATGGGAGTTTATTACTACATACATTGTTTGCATTCTTGAGACATTCATTT  
CAGGGGAGGTTTTGTATTAATTGAGGACACTTATTTTGTATCTCACTATTACTATTATAGTTTATCCATC  
ATTCGTTGTTTTCTTTGAATATTTTATTGATTACATTTTCTGTTAATTCTTCTAATCCTAACTTTTTCAG  
CCAATGTTTCTATTTCTATTTACATTCACGTAGTTCTGTAACCTTAGGGAGACTCTACAACAGGAACCATT  
AGATTTGATGATGTCCATCT

>NF11217\_low\_15 signature: TGATGATGTCCATCTCAT 3' end  
CTAGTGGAGAAGCAGAGATAAACGGATTGACCATTTGGGATGTTAAAGAACGAATGCAAAAACAACAAAAT  
TATAATTGAAAAGTTATGTGGTCAAATTTAATATGAACATTCTTTTTATTACTTTTTATCTTGAATATGGA  
AAACGAACAATCATGAGTGTATTTTTCTTAAACCTGAGAATGAATTTACGAAATATTGTTTATATCTTC  
TTCGTAGTTATTTTATAAAGTAATAAAAATAATTATGTTTAAATAATAGGTAAAGTGAATCATAGTATCA  
AGTTTTACTTTAGAAAATATTATTTTTAATTTGATAAGTTGAACAATATGGGGTGGTAAAGTGGTTTTGT  
TTTTCTTAAATGATTTTTTAAAATTTTTAATATCAGCTACAATCATAAGAATTCATGATGATGTCCATCTCA  
T

>NF11217\_low\_16 signature: TGATGATGTCCATCTC 3' end  
GTCGAGTGAGATGAAACTCATGCAAAGGCCAAGAATGTATACTGAAATTTTCTCAATGTCATCTTTCAAG  
TCCTCAGAAAGGCCAAGAATGCATACCTTTTGGATTGTGATAGTATGATATCATTGTTGATCAGATAGCCATG  
GTGAGGGGAGGAGAAGAAATGAGAAATGTGGTAGCTGTAGTCGATCATAATGGGAGTAATGAGATTTATAT  
ATACCATTTCTTTTTAAGGAAGTGACAAAAAAACTTTGAGAGTGTGTTTGGATGAGGGAATATTTGAGGC  
AATGTAATGTTTTGAGGGAATTCATTTATTTTGGAGTGGATTCAAACAATAGAATTCACCTCAAAGTAAT  
TGAATTCGCTCAAAACATTACATTCCTTCAAACCTGATGATGTCCATCTC

>NF11217\_low\_17 signature: TGATGATGTCCATCTCA 3' end  
AGATGGACATCATCAAATAAAACAACATTAACCACCTTTTTCTTGAATCAAAACTATGGTATCATTGCTC  
AATGCTTGAAACTTAAGAATTTTATTGTACCATTTAAACCAGATCTGATGTCTTTGAAAACCTTTGTGGCA  
CAACAGTATCGTTTCTTGCTGACAGATCGGGAGTTTGATATTGGACTTAAATATTGATTGCGCTCCAAA  
AGTCTTCAAGAACACTGCTGCACACATATGCAGGACTAGGAGGTACCTCAGTGTAGTTCTCCTAAAGAGC  
ATGTAGCAGAAAATCAAATGACCGTTTATAACAACCTCTGTATGAAATATAAAGGTCATCATGGTCAAC  
AGGCAAAAATAGTATGAACGAATTGATGATGTCCATCTCA

>NF11217\_low\_18 signature: TGATGATGTCCATCTCATT 3' end  
TGAGGAGGAGCAGAGACAGGCAAATTTGCAGACTTTCTTTGAGAAGGCTCTTCAGGATTCTTTTTATTGTG  
GAACTTCTTTCCCGCAAATCGAATCCATGGATTTGGCATCTGATAATAAGAAAAGGCGATTGTCTCAGG  
TTGATCGCATAACGCTGTTGTGCGAAGGTATTTTGTGTTGACAATCCTTGCAGTTTCATACTCGAATTTGG

TAATGTTTTCTATCAAGATATCTCAAATAAACTAAGATTAGAATTATCACTAGCTGACTTAGATATGAAC  
TTGATATCAGGTAGCACACAGGGTTCAAATGAAGATGAGGATGATGATGTCCATCTCATT

>NF11217\_low\_19 signature: TGATGATGTCCATCTCAT 3' end  
TGAGGAGGAGCACAGACTTGCATCTGAACGACGAGTGGGTCCACCAATACCTAACAGAAAAGTTCAATAT  
GCTGATCTTCATATAGATAAGCGTACAAGAGAGTCACCCTGTAATGATTTATCTGCTACCAAATCTGTAC  
CTGTTGCTGTTTTAGGTAGGATACTTTTTCTAGTTATAATGGACTTTTTCGAATTGTCTCTGTTTTTTTTCT  
CGTAGCATCTCAATATATATGTGGTAAAGCATCTTGGTATGAATTGTGATATTGTCATTTGAGCCTGTCA  
GATTTGAACCAATCATCTCTAATCTTATTGATGATGTCCATCTCAT

>NF11217\_low\_2 signature: TGATGATGTCCATCTCAT 3' end  
TGACATTTTATATTCTTCCTAGTTTGAATCAGTCATACGTTTTTAAGAATATGTTGCCGTCTTGGCCTT  
CCTAAAAAAATGAGAGCAACACATAATCGTCCTTTTTCCAAATCAAATAACGAATATGATTTTGTTCAA  
AAAAATAACGAATATGATCAAACACAACTACAATATAATTTTCATCAATCTATAGTTTTTTCTTTCTTA  
TATACGATAACAATTCAGCAGCGTAACCAACATATTTTCAATTACTTACTACAACAAAAAAGGTTAC  
AATAACATGGTTGATTACCAAGGTTACATCTTACTTTTCATCATATGGCTAGTATCAACAATTTTGTAA  
AAGCCATACTACAAGAAAATACAAGAAATCGAAGTTACCTCCAAGTCCATTATCTTTACCAATCATTGG  
ACATCTTCACCTTATTGGTTCAATACCTCACCAAGGACTTCATAAACTTTCAACAAAATATGGACCTATA  
ATACACCTTTTCTAGGTTCCATGCCTTGTGTTGTAGCTTCCACACCAGAATCCGCTAAAGAGTTTCTTA  
AAACTCACGAAACCTATTTCTCAACCGTCCTCAAAGTTCAGCTGTTGATTATCTAACATATGGCTCACA  
AGATTTTTCTTTGCTCCATATGGACCTTATTGGAATTTATCAAGAAAATATGCATGTCTGAACTTCTT  
GGTGGTAACACATGATGATGTCCATCTCAT

>NF11217\_low\_20 signature: TGATGATGTCCATCTC 3' end  
GTCAGATTTTTGTGTGGGTGTCAAGGGGTGTTTATGTATCATAACTCTTAAAAAAAACGAACCTTCCAA  
CCCCACGACACCTATAATTAGCCAGAAGCAGTCATGCGAGGCAACACTAACATCAGCTGAAACAAAGAAG  
ACATAACAAGGTAAACTTGATATTCTGAACCTTTCTATTATGAAATTCTCTTCCAATTTCTACTCATATC  
TTTATTCTTCCCTTTATATTTTGTAGATTATTTATTATATACTGTTTCAAGTTGATGTTCAATGATGGGA  
GCAAGACTAAATTGTATATCTTGATGATGTCCATCTC

>NF11217\_low\_21 signature: TGATGATGTCCATCTC 3' end  
TGAGGAGGAGCACAGAGAGCTCTGTTGCTGTAGTGTCTGAGCCACAAAATGCCGTCCAATCATTTACTAC  
CATGCCAGATGCTATTACTTCACTACCGGATTGACAGTCCCTGCAACCAACGGAATTTGAAGAAGTGTA  
GAGAGTTCATCCAAGTCTTCAACAGAAGTATGAGGGTGGACCTGCATTTCAGTGTATATGATCAAAAGATA  
GAACATTTATTCAAGTTGAAACATTCAAAGGACATGTCTTGACCTACCAAACCACCTCTGTTGGACAG  
AGCACAGTAACTGCCAGAAAGTGATGATGTCCATCTC

>NF11217\_low\_22 signature: TGATGATGTCCATCTC 3' end  
AAACTACTATATTCAAGCTGCAAGAACATTGATCATGTTATATCGCTATTTATTTTTATTTTTTTGCCAC  
ATTAGAGTGATGTTGTGGAAGTTCTTGTTCAGCTTAACATTTTTTTGCTTTTTTCAGACGATCTAAGCC  
CTTTTTAAACAATCACTTTCCACGTTTGGCTTAGGCGTACTATGCAGTTTCTCAAAGAGGTTTAAATCAA  
AGTTTGGTAGTGCCTATAAATGGATAAGATCATTAAGCAAATTGTCAACTTTTTTTTTCTGAACTTTTTCA  
AAAGTGATGATGTCCATCTC

>NF11217\_low\_23 signature: AATGAGATGGACATCATCA 5' end  
AATGAGATGGACATCATCAGTTGATAGAGTGTTCATCGAGGCCACAGAAGAAATCAACTGCACATCACAT  
GAAGACGAGGCCAGAAAATCATCACTGTGATAGGAATCGGAAACCAACAGAGTATGCTCCGTTGCCA  
CCACTGCCTCCTGATTTTACAATTGTCAATTTCTGCTGATGCATCTTCAACGGCTACTGTTGTTCCCTCCAC  
CCCCTACTCCTTCTACTTGATTTCGGTACTTTTTTTTTATTTTATTTTATTTTAAAGTATCTGTGCTGCTC  
CTCAAGAT

>NF11217\_low\_24 signature: TGATGATGTCCATCTCATT 3' end  
AAAAGAGGTAAAACCTGCATTTTTATGACCGTGTTCAGTTTGTAGTTTGTAGCAGTTTGTAGATTGTAAA  
TGTGAAAGCTGGTGTAGTTTTTATAATCCACTAGTAGCCTTGTCTCTAATAGTTTTCAAAGACTGCTTC  
ATCTAGAATTATTTCTTACTGATATAACTCTTGAACCTTAGGTTACGAAAAGGCATGCAAATCTGTTAA  
ATTTTAAACAAGTCTTGCTTGTTTTTGTTATGCCCTGAGGTTGTAGGACTTTATTGATGATGTCCATCTCA  
TT

>NF11217\_low\_25 signature: No signature  
TGAGGAGGAGCACAGACACAACCTTTACCAACTTTTTCTAGTGAGAGAGGAGAGAGTCAATTCAATATGG  
TGCAAGGCTTAATTTTTGAAGGGGTTCAAGACAATGAAAATATAGTAAAATAGGTGTAAATATGAAAAGTT  
GAGAAGGTGCAATTGAACCCCTGGCCACAACGTGGCTCCGACAATGTGTCTAATATAAATCCCGACATTT  
TTTTGATTAATAATAGGTTATCAATCATGGTCTCTCGTTGGATGAAATGAAGGAAGCAATGAGTGTTTT

>NF11217\_low\_26 signature: ATGAGATGGACATCATCA 5' end  
ATGAGATGGACATCATCATAACTAAATAAATTACATATAATGGAGAGAACCTATAAAAAAATACCGTAA  
CTTATTTGATCATATACTCTAAAAGACATTTATTCCTTCTCAAATTTTTTTTTTTTGGTACATCCTTCTCA  
ATATTGTTATTAGTTATAAGGTGCAAAGAGAGTTAACTAGTAAAATTAATTAAGAAAATTGCATCAGTTA  
GCTGATTGCTGATTATATGGTGTACTATTAATATTACCTTCATCCTTTGCTTCTCCTCT

>NF11217\_low\_27 signature: No signature  
ATTCCTCCAACCTACCCATTGCATAAGGATGATAAGTAACCCTAGTACCCTTTTCACTTTTGTACCATC  
TGGTAAAACATCATCATCCAAACAAAACCTTTGAATCAAATTGAATTGGTGGATATAGTCTCATACTTTCA  
TGTGCTGCTGCTTGAAATAATGCAATTTCTAAGTTGTTCAAATTCGTTACACCAAAAATATTGTTTT  
CATCATCATGTGGTCCAATTACTCTCTCTGCTTCTCCACT

>NF11217\_low\_28 signature: No signature  
CTGAAAGTAAAATTTGATTATTTCTCTTTCTCACGTTCTCTACCATATATGATAGATTTCATCCATGAA  
TGATGAAGTCGAAAATCATTGGCTCCATTGTCAAATAACTAGTTAATTCAACAAGTTTTCAATCTAGAT  
TTTTCTTTGCAAGAACTCTAGCCTCCTGACCAATACTTTAATCCTAGATTGAAATCGATTGATAGAAG  
CTGAAAGAAAGCATTGTATCTTTCCCTTTGCTTCTCCTCT

>NF11217\_low\_29 signature: No signature  
TAACACACACTAAGTTTGATGAAATCATGGTGGATTCTGGGATTCTTTTGAAGCTCGAAGTGTAATTTTT  
GCTAAATTTGCGGCGACACATTGCACTAAGTTTGACGAAATCAATGTGGTAATTGAGATTTTGTGGAAGT  
TTCAAAGTGCAGTTTTTTGCTAAAATCACGGTGGCACAACCTTAAATATTCCAAACACACAACCTCCAATGT  
TTGGTATTCCTTTCTCACGTCCCTATGCTACTCCACT

>NF11217\_low\_3 signature: ATGAGATGGACATCATCA 5' end  
ATGAGATGGACATCATCAAATCCCTCAACACTTGGCCAATTATTCTCCGTGTATATTTTCCATACTCCTT  
CCTCATTCCCCAACTTTTTCTGAAAATGTTCTCTTAGGCCTATAAAAACTACCTTTTGTATCAATCAGATC  
CATATTCTCAGTTCACTAACCAAAACGCCATTCTTCTTTTGTCTCTCCTCTCAAATTAAGTGAATGGC  
AACAAGAAAAGCAAAGCCATAGGCATTGACCTTGGTACAAGCTACAGCTGCATTGCAGTGTGGCGAAAC  
AATCGTGTGAGATCATTCCAAACGACCAAGGGAACCGTGTCAACCCCTTCTTACGTTGCCTTCCACCGACA  
CTGAAAGATTAATAGGCGATGCTGCCAAAACCAATTAGCCAAAATCCCCACAACACTGTTTTTGTATGC  
CAAACGTCTGATTGGCCGTGATTCTCTGACCAAACAGTCCAACAAGACATAAAGCTTTGGCCTTTTAAA  
GTTGTTCCGAACCACAAAGACAAACCCATGATTGTTGTCAATTACAAAGGCCAAGAGAAACATTTTTTAC  
CTCAAGAGATATCTTCCATGGTGTGTCTAAGTTAAAGGAAGTTGCTGAAACTTATTTGGGTGATGAAGT  
GAACAATGCTGTTATCTCTGCTCCTCCTCA

>NF11217\_low\_30 signature: No signature  
TAACTGATTAATAATATGCAATTCATTTCGACTTCTTAGTCTATAAGGTCTAACTCAATCAATAAAAATT  
CTCAAATTTGTTATACCGAATATTGTGACTGCAGTTTAAAACCTCAGTTACTCCACTTATGTGTGTGAGT  
TTTCGATGGATATTGTCTGTTGTCTATCTACCCAAAAAATAAATTCGCACTTTAGACCGTGTAATA  
ATATTTGCGTTAGAGAATGATGTCCATCTCATTGC

>NF11217\_low\_31 signature: TGATGATGTCCATCTC 3' end  
AGGGTTTGTATTGGTAAAGAAATGGCTTTGATGGAACCTTAAAAGTGTGGCAATTTCTTTGCTTAGAAAGT  
TTCATATTGAATTGGAATGGAAGATAGAACAATGTTTCATGGTAACCCAAGATTCTCTCCTGGACTAAC  
TGCCACTTTTGTCTTTTGGTCTTCTGTATTTGTTTCGTTCCAAGAGGAACCAAGTGAATAATCCGTACTACT  
ATATATATGTATCTGATGATGTCCATCTC

>NF11217\_low\_32 signature: No signature  
AGAGAAGCTCAAACGACTATGGTAGAAGATCTGAAGAAAGGTCAACCATAAGTCAACATATTGAATCAGA

AGAAAATGACGTCTCTTAGAAGCTGAAGATTTGCTTCATTAGACTATGTGGAGATCATCAGACTCAGACG  
ACCTAGCAGACGCAGAAGACCCCATCAAACCTTGAAGACCTTCAGACTTTAGAAGCACTCGAGGGACCCA  
AACTCCATGTCAAATTTGTCGTC

>NF11217\_low\_33 signature: AATGAGATGGACATCATCA 5' end  
AATGAGATGGACATCATCAGATCTGCCATGTCCTTTTCGCCGTGTTTTATTCAATTTTTGCCGTCAGCTCAAC  
TGCTACTGTGATTTTCTTGATTGATACTCATACTTTTATCAAAGTAGAGTCATTTAAAATCTTATTA  
TCTGCATATGATTTGTATTTTATCTACATGTATTAACACTTGAGTTTTCCCATAAAAACAATCTCTTCT  
GTGCTCCTCCTCAAGATC

>NF11217\_low\_34 signature: TGATGATGTCCATCTC 3' end  
AGGTATGAGACTGCATGGTTGAAGGAAGGCTTATAAGAATTGTTTGGTACTACCTATATCAACATGATGC  
ATCTTCTTTTCGGTAGCACATTTTATAAGAAGCTCCACAATTACGCGTGCTTGACTTGAGAAATTTGGG  
ATGTGTGACCTACCGAGAAGTTTTCCCGGTAAGCATGCGTGTGAAAAGACTCGTGTTGGTTTTATAGGTGAT  
GATGTCCATCTC

>NF11217\_low\_35 signature: TGAGATGGACATCATCA 5' end  
TGAGATGGACATCATCAAAATGTAGTTGGCATTGGCAATTTTTTAAGGGTTTCCAAGTACTCAACCTT  
CATTTTTAACACATTTCTCTTTTTTACTCCTAAAGAAATTCTAGCATCTCTAGCAATTTTCTTTTCTTA  
GTTTTCAAATGGACTGGTAAAAGCTGAGAAGCTTACTACCTTGCTAGTAGTACATTCAACTTCTCTGCTCC  
TCCTCAAGA

>NF11217\_low\_36 signature: TGATGATGTCCATCTCATT 3' end  
CGATCTTGAGGAGGAGCACAGAAGGAACAACAATTCATGAAAAAGAAAATCAATTTTCATGGACAAAAGAT  
AATGAAGAAAAACCCCAAATTCAAATTTTACAAAGAATCAATTCAGAAAAGATGTTAGGGGAACTTTC  
GTCTTTTTTGACCAAAATTTATGTCATTCTCTCGCTTTTTTTCAGTGATGATGTCCATCTCATT

>NF11217\_low\_37 signature: TGATGATGTCCATCTC 3' end  
ATCTAGTGGAGTAGCAAAGGTAGTATAAATACAAACATGTTTTCTCATTCCATATTCATTTTTCTTTTTCC  
ACAAAGAAACATCAATACAACAAGTTTTTTTTCCATTTCATCTTTAATTCTTTTATTATATTCTATTTC  
TACACTTCATTTAGTTTATTGTTTGGGTTCAATTCATAATAACATTTGATGATGTCCATCTC

>NF11217\_low\_4 signature: TGATGATGTCCATCTCA 3' end  
AACCTAGAGTTTCTTGCTGATCAAAAGGATAGATTGGCACTTAACAAATTTACTAGTGGTGAATGTGAAA  
TTGGAGTCTTGAAATTGTTAAGAGAATTTAGAGCTGTATCGAAAAGTTGTAATGACATATTTGTTGGTAA  
AGATGGTAGAGTCATCCCCGGATATTACCAACTGCACCTTTGATGGATAAATCTGCGGCGTATGGTAGG  
GAGCATGAGATAGAGGAAATGACTGAATTTTTACTTTTCAGACAGTTACAACCGGCTATCTGTAATCAGTA  
TAGTGGGTCTGAAGGGGATGGGTAAGACAGCCCTTGCCAGCTTGTTTACAATGACCACAGGATACAGGA  
GCAGTTTGAATTTAGATCCTGGGTCCATGTTTCTGAATCTTTTACTGTCTTTCGTCTCATGAAAGAAATA  
CGCGATCTTCAACCGCAACATTGGCAAGCAGGGAGTGAATTTTTACTTGTTCTGGATGATGTCTGTATTA  
AAAATAGTTATTATATGTCGGAGTATTTACTACCTCTTTGTAACCAGGGATCTTTTCGAGGCAAGATAAT  
TGTGACGACAAATGATAAAGCAGTAGCATCAGTCATGAGATCGACCCAGATAATTTATTTAAGGCAATTG  
GAGAAGAGTTGATGATGTCCATCTCA

>NF11217\_low\_5 signature: TGATGATGTCCATCTCAT 3' end  
TCTTGAGGAGGAGCAGAGAATATGTGGGATGACATGTAGAAACCAACAAGACCCTACTGATGCTAATA  
GTTGATCGTTTCTGTGTGTGGAAACGCGATTCACTTTGGTTGTAATTGCTAATTAACATTTGTAACG  
AAGGGAACGTGATTTGTTTATTATTATGATTTTTTATTAATAAATATTTGTTTTTTAATTTAAAAT  
CTGCCACATGTCTTACATCCAACTCTAAATGGAGTAAATAGAGTTTAGCCTAAATGGAGCATGCCCGAC  
TCCAATACGCCAACCACAAAATAGTCATAGCTGAACAACAGGAGAAAGAAATAAAGTAGAATCAACCGGA  
GTACAATACGTTCAATCACATATGGTTTCTTAACCCAACCACACCCTATAACCCTCCATGGATACAATCACC  
AAAAAATTTATACAACAATGTAGATTTTGGATGACCTATTTTCAAATTTAATTTCCCAATTTTTTTAAAAT  
GATTGAACTTTTTCCCATACATTTTGGAGCTGAATTTTTAGGGAAGCTTTAAGTTATACCGTATGAAGGAA  
GGAACCTTGATGATGTCCATCTCAT

>NF11217\_low\_6 signature: TGAGATGGACATCATCA 5' end  
TGAGATGGACATCATCATGTAACCTACCATGACAGAGCTAGTGTGTGGCATATTAATTTAGTGACCATGT

TTTCTGTCTCTAAAAAATATTTCTTCTTTCTACTAATCTCCTACAGTGAGGTAAATATAATTTCTCTTGG  
ACCAAGCATAATCCCCTTATGTTAAATTTTTCTTATAACAAAAAATTAATCAAAGAATGGCAAAGTG  
GAAGATGAAAGGAAAAAAGCAGGAAAGAACAAGGGAACAGTTAGCTACTATACATTTATGTTAAAGTGGT  
GAGCTTTCTTCTGCTGTTCCCTAGTTATGTAGGCTTCAATATGAAAAATATGATGTGTCTCTCTCAACT  
CAACCATCTAGAATCTAGCTTTGTCCAGTGCTATGAGTACTTTGCTGGATTGAGATTTAAATGTAGTGGA  
CCATTAGTTTTAATTTCTTCCCCTATGTCTAACTCCAAGCTTATTCATATACGGGTAGCATTTTTGGTGATAT  
AGAATTGGTGATATTGGTGACATTTGAGGTTGGCCTGTGATTGGTTTGGGATCTTGGAGTTTGTCTCCTC

>NF11217\_low\_7 signature: No signature

TCATCAACTGCTAACTATGCACAAGTTGAACATGGAGTTCCCTCGAAAAGCAATAGAACCAAGTTACAAAA  
TAATAACAAGAAACCCTACAATAACGATATTGATGTATAGTGAAGTCCTTAATATTATTGAGATTACATC  
TCTTTGAATACAATTGTACATAAGTAGTTTACAAATATTGATGTATAGTGATGTACCTTCAAGATGACAA  
CCTCTTTATATTATAGTTTCGATTCCTTTAAAGTAAATAGGTCTTCTGGTTGAGACTAATTCTAAGAGAA  
TGTCTACTTTGGAAACCTTTGTTGGATAATCAGGTAACACTTTTTAAGCTCGTCGAGTAATAGATTGCCAGT  
TTGGGTGGAAGTGTGATTTTTTTTTAAAGGGACCTTTGTGGAATGATATCTAGTTGAGTGTTACTCCTTTG  
AGGATTTGTTACCCCATGCTCTTTTAGGTCTCTATTCAATAAAAATAAAGTGATTGGTATGACTTTGAGA  
GAGGGATATGGGTGGGTTTGGGATCTTAAGTGAATCGC

>NF11217\_low\_8 signature: No signature

TCAATGAGATGGACATCATCAGCGTCGACATTGCAATCCACTTCACTGGCTACCAGTCTAATCCACCCTT  
CTTGACTATGATCTGTCAATTTCCAATGTTGTGGTATTCTCCTGGTTCTCTCCATTCTCAGACATACGCGG  
ACCTACTGCCACTGAAGTAAGACATCACGCACCATACACACTGAGATACATGGTTGTGTTTCGACGTCAT  
TCCACAACCTTGTCTGTTTTGTCTGTTTTCCAGATGCATCAAAGGGTCAGTACGAAATCAAAGAGTTGTTGGTG  
TTGTAGAGATTCTACTAACTGAAAGTAAAGAGCTACAAAACCATATGTCGTATCCAAGTTGTCTTGAATA  
ATGTTCTATAGACCTGCTACACTTCACACCTCCTCTAGTTTTGCACATCCGAAAAAGACATGTCATTCAT  
TCTCATATGAGCTTTCACAAGGCACACAACAATCACAACAATGTACCCCGTGAGTTTAAAGCCCGTGTCT  
CGTGGGTAAATACCTCTTCTCTGCTCCTCCTCA

>NF11217\_low\_9 signature: TGATGATGTCCATCTCA 3' end

TGAGCTTGTGGTTCTAAATATTGTGTGTTATGTAGGTAACAGTTTGTAAAGCACCACATGGTCTTCTCT  
TTAAGGTAATAGACGTATTCTAGATATTCTGCTTTAAGTGATCAACAAATCCTAAGCACCACAAACAATTAT  
TCGTTTTATTCTTGACTTCATTTTTGATAGTATATAATATGCACACTTTTTGAAAACGTTAGAGGATAAAAATA  
TCTTTTTGTTATCATCAAAATTCGAAGATAACCCATATTTTTGAATCTAACCATATTAACATGGTATACAT  
TCAATCTAACATTACATTCTTGTAGATGAAACTCATATGGGTTACTCCACTCTATGTAGGCACCATTT  
AAAAAGTGTGAGATTTAAATTAATTTTTATCCAATAAAAAAGTGTAGATATCGTATTTAAAGAGAGTGT  
TCATAACACTTCTCATTTTTTATGATAATGATATATCTGACGGAAACCTTGCTCACATGAGCATCACACCT  
GATGATGTCCATCTCA

## II. TAIL-PCR FSTs obtained from a single Nod+Fix- NF11217 *Tnt1* mutant in R<sub>1</sub> generation

>NF11217-F-Insertion-1

CCCAACAGTATGCTGATGTAAATTTTTTTATTTTTTTATTTTTTTTCTATAAATGCAAATTTTGTAGATAAGTTAGTT  
TCATAAATGCAAATGATATGTGGACTAGTCTTTTTTTATTTTTATAAATTGGCTAGTATTTTTATTCTTACTAGATAC  
GGTATTAGCATTTTTTACACACTACAATCAATATAATATTGAGCAGGGGGTAAAAATAGTAGTCAACACAAACCCGTT  
TATAGAAGTATGATCAAAATACTGGTTCATACTAATCAGTGCAGTTTTCTAATGTAAGCTGATTTTTGTACTCAGAACT  
TTACTCATGCCTACAGTTAAGTTAAAGGAATTGATGATTTTTGAAAACCTAGTTATGTGCAAATTCAGATAGACTTGTG  
ATGACAACATTGTAACCATAATCTTATAACATGAATGTCAAGCGAAGTGCTATCAATACATTCTTTAACACTAAGAT  
TGATTGAATTTTCATGTAAGCCCCCTCCATTTTGGAAATGACTTCCAAGCACTTAGGAAATAACTCCCAATAACTAGTG  
GGACAATCAATGTTGAAAACAGAATATTAGAATGTGTTACAAGTGCTTCTTGATATTTAATATACATCCTTGGGTGG  
GATTCAGATTATATGCAGTAAGAAAATCCATGCAATAACACAATTTACAAGTCTGGACTGTTCAATCTTGATTGCAC  
ATTTCAATTAACAATCTGAGCTGTGCATACTTGTCTATGATTTCTGAGCCGTCACATTGTCCGACTTTCCGACTGCAG  
GATCAAAGTTTGTAGATTTGCAATCAAGATTGGATTTGCCCTGAAATCGTAACTAAGTTTCCAACCTGCTAACTGTGT  
GACTGCATAAAAATCACATTTTCTTTACCGCATAAAAAATCTGGAACACCTTTGGAGAGAGTTGCATTAGACTGAGAAG  
CAGAATAAAAACTATCTTATTTTGGTATGCATCTTAGAAAATTATCTCTGCACATATATGTTATAGTAGAGTGAATT  
GGTTGCTAGAGAACAAACGAAGTAGTTATTTACAGGCTA

>NF11217-F-Insertion-2

CCCAACACCTCTAACACTCACCTCTTATTACGTGAAATTATGTTGGTTTAACTATTTTGAAAATTGGCCTCACATA  
AGAACATTTCTACATGAATTTATCCTATTTCTGTTGCATGATGAATCAATCTTAATTTTATCATAGGTTGGAGGGTA  
AGGTTGCTATAGTGACTGGGGGAGCAAGCGGAATAGGGGCGGAGACAGTGAAGACATTCGTGGAAAATGGAGCATT  
GTAGTTATAGCAGATATCAATGATGAATTTGGCCAGCAAGTTGTAACCTCAATTGGGTTAGACAAAAGTGAGTTACCA  
CCATTGTGATGTGAGAGATGAAAAACAAGTTGAAGAAAACAGTAGCTTTTCGCATTGGAAAAATATGGAACCTTAGACA  
TTATGTTTAGCAACGCTGGAATTGAAGGTGGTATGTCTAGCAGCATACTAGAATTTGATCTGAATGAATTTGACAAC  
ACCATGGCCATTAATGTTTCGTGGATCACTCGCAGCTATCAAGCACGCTGCACGTTTCATGGTGGAGAGAAAAATCCG  
TGGATCCATAAATTTGTACTGCCAGTGTAGCTGCCTCTGTTGCTGGTTATCGTGGCTATGATTATGTTTCGTCCAAAC  
ATGGTCTCTTAGGACTTGTACGTTCAACGTGCGGTGAGCTTGGAGCTTACGGAATTAGAGTCAATTCATCTCACCG  
AATGGTGTGCCACGCCTCTTGATGTAGAGCAGTGAATATGGAGATGAGTGAAGTTGAAGCTAATATGAAAGATTC  
TGCTAATTTGAAAGGAATTACACTAAAGGCTACGCATATTGCAGAAGCTGCTCTCTTTCTTGATCGGAAGAATCGG  
CTTATATTAGTGGACACAATTTGGGTGGTTCGATGGAGGCTCTCTGTTATAATAGGTTGTGTTCCACTACTATTAA  
AAAAATAAGCGGTTCCAAATTTGGGAATGTGATAAAATATCTACATTCTGTTTCTAAGGTTGTGTAATTGGGAATG  
CGTCTTACTATTAGAAAGGAAAGGC

>NF11217-F-Insertion-3

CCCAACACTTTGCGCTCTTGTCAACTTTGTTCTTGTAGGCCCGAGCTCATCATAAGAAGTGATGGGGAAAACATC  
TTTTAAAGGTGACATGACATGATTATGCACATACTGTAGAGTTACATTAGGATCCTTGGAGGCATTTCTACCAGTTTC  
ATAGATAGTAACCTACTCCTCTTCCAGACATGATGGTATGCTCCTTATGACATAACAAAGCCTCCCCTTTAGAAAGTT  
CACACTCAGTGTCAAGCATATGAAATAAGTTATGAAGAGTCAAAGAAGGATCTGCCTCCATATCCTTGTGGATTACT  
GGTCCAACAGTTTCATCAACATTGACTCCTTCCCTTTCATCAAATTTCTATCCACAATTGAAACAACCTCATTATTTAA  
AACTTTCTCTGATGCAAAATTATAACTAGCTCAGTGACCTGTTCCCTACCACAATGTGTGGAGGGCATGGCAGGTTG  
TTTTTCAGTCAAGCTAACATGTGCTTTGTTTTTAGTTTTCTGAATTTTACAGCATTACCTTTCTTAGATATAGTCTCAA  
AACCTTCCCTTCTGATTAGTATAACCAAGTTTTTACAACCTCGAGAGTTTACCTCAACTCGTTTTAGCTATGTAAACTC  
GAATCGTAAACTCGTACGAGTTTACCTGAAATTAATTATAGAAAATTTATTATAACATATGTAAGCTAATATTTAA  
ACAAAACATAACCAATTAACCACATTTAAATATTAACCTTAACAATAAAAAACAAAATTTATCAGTACATTTAAAC  
TCTGTTTTCATCTTTCAGTTGTAACCTTTAACTTCAATTTGCCATTTTATCATTGAAATACTTGAGCAAGTAAATAT  
TGAATGTTTTCAAATCAATCAATAAACAAGCTTCTGAACGCATTTCCCTAAAATTTTCATGTGTATGTCAATTGTCA  
CCGCAATGGGGTAGCTTTCTGTACATAACAAGCATGGTAAAAAACGAGGCCATGTTACCGGTAAGGCAACATTGAGC  
ACTTGGAAATGGAAAAAGAAT

>NF11217-F-Insertion-4

CCCAACACTTCACTTTGTATTTACCATCCTTTAACTCCTTATAAGGTTTGTGAGAGTATTCCTCAATCTCAGACTCA  
CTGATATCCGACTCTTCTTCCAGAGCTGTAGTCCATTGAAGCTCTGCATAACAATTACAAATGTGAGTTTATAAGTATA  
AAGTAGCATATAATTTGATGAGGAATATCAATCAACAATGAGCAATAGCATGTAATTTAAATGAAGAAAAGAACATT  
AATCAACAATATACAGTTGCATATAATTGAAAGGAAAAAACTAATAATAACGGAACAAAGGTTAAATTTTAGAATAA  
CTCAGATGGGATATTTTTGTTTGGTAGTAAAGGGTGGATGGAATATGCTAGTTAATTTTTAAAAAATAGATATCACA  
TTCCCATCTATAACACCAATCCACATACCCTAAAAAAGGTCATTTTACAGAAATATGAATAGGTGAAAATAAATAAA  
GTTGGTTGAAAAAGAAAACAGAACTTGTGATCGACAGTTTGAATTTCTGGAATGGTGTGATTCTAAACAACAAATTTT  
AAATTGCGGAGGAATTTGTCTCAAACATCTGCAGATGCCCGATAGAGAACAATTCAAAGAAGCACACCAAAATACAC  
GGGTGACGGGTATATAGAAGCATCTCTGGGTAAGAGCATAAAAATATGTTTTTCATAAAAAGAAAACAACATTACAGTG  
AGATAGATGGACATGAGAGATATATATGATGCAATTAGAAAAAGAATAAGATATTTCCCAAAGCGAAAACAACTGC  
ATAAGTGCATAACATGCATTGTGCACAGTTTAGAAATACAAATTCAGAACATATAAAGGAAAACACTACAGCCATGCAT  
GAAGCAGAGTTACATCAAAATGCACTACTTATTTAAAAATATAGATTCAATAACATGCACCTCCTCCAAAAGAAAA  
TACCACACACAATTAATACTAAAAATTTGTTAGAAAAACAGTCTGCTAG

>NF11217-F-Insertion-5

CCCAACAGAAACCACAGTGTTCTTTGACACTATTGTGAAAGCTAACCTCAGTTTTCAGACAACCTCAAGTTTTCGAGG  
GTATGTCTCGTGAAGAGCTTTTCTTGTGGTTACCTGTTAAAGATATCTTTGTTGTGGATCCATCTTCTGGTGTAAAT  
CTCATTGATATTGGTTTTGCTTTGAAGTTTCTCGCCTTCTCTCGTTTTGATGAGCCACCAATTTGTAGATCTCATCT  
TGGTACCGTCTTTTCTCTCTCTTTTCTAACCCTCAGTTATGGGTTTTAAATTTATTTAAGTAAATAATAAAAAAA  
TAAACAGGGTTTTGTTATAACATAGTTCTGATTTTTGAAATTTGAATGTTTGAATTACAGGTCTTTTCAATTTTCGTATGGG  
TGGAAGTAAAGGCACTGCATTGGAAGATCAAAGATAATAAGATTATTCATGATCTGTATGAAAGGATGGCTTCCACC  
TTTTTAAATTTCTGGGGTTTTGTTGTTTTCAGAAAAATTACATTCATGTACAAAAATTTGCAACTCATATAAATTATAA  
AGTATAATAATGCCATCAATAGTTGAATGATAATCAATACTAATATCTACCTTCAATTTGTACCTAAAAAAAGAAAA

AGTATCTACGAAGAAATTACCCCTAATTTCTTAAGAAGGATTTTCGATTTTTGAGTAAGGATCCATTTTTGTGCATCCA  
ATAATTAATGATAATCAATACTAGTATCTAGCTCAATTGTAACCTAATGAATAAGTTCTTCCTTCCATTCAAGAGT  
AGAACTACACCTAAGTACTTAGAAAGGATTTTCGATAATTGAGTAAAGTTCCATTTTAATGCTCGATAGTGTGGT  
CACATACTTAGTAACATTAATTTTTGTAATTTTTTTCTCTCTCAAGTTAGGAA

>NF11217-F-Insertion-6

CCCAACAGCAATTACGAATATGTGCGGCAATTTCTAGTGGCAATGTGCGAGGAGAACTTAGAAATGAGAATTTATGCT  
TTGCCTTTTTTTTATGGGAAGCAACTTGTGTAAGAACATGCCCTTATAAATAACTTATGATCATAAAGATATTGCTT  
GTCTCCATGTCCATGAGTGCCTTTTCATCTCCACAAAAAATGTAACCAGCAGCAGCATATGTATTTTTTTTTTTTT  
TTGAACAAGTATATGTATTTGTTTTTTTTTTTTTTGACAAAAATATATGATATTCGTTCAATCAAAATTGATATAGTGC  
ATCGATAACAATACAAATCCAAATTCATAAAAAAATAATGATGAATCTGTAAACAACTCACAGCATCCATGTTAA  
TAGCATAAAACGGCAAAGTATATGCTTACAAATATGAATATATTCATGTCTCCAAATACTCATGTGTCCAGATCTG  
CAACGTTGACGACTCCAAAGTCATTGTCTTTGATCGGATCTACAGTTGCTCAAAGCTAATCTTTCAACCTGAATCAA  
ATAAACACCGCACTAAGACGGGAAATCAAAATCACACTGCACAAAGACGGGAAATCAAAACATACAGAGTCGTTCAA  
AGACGACAAAATCACGAAAACAAACGAAAAGAAAATAGAAAATATGTGAAATCACTTATTCAATTAAGATAGAAAAGAA  
AAACAATTTGGAGGGGTGATTTTTGGGTCAAATTTGATCCTAAATCATCCATCTGAAAAGAAGAAAAAGAAGAAAGG  
GGTGACTGCTAGGATTTGGGAAGGAGAGAAGAGAAGTCTAAAAGGCTTGACAACCTCCATATGTATTTGTTTTAA  
GTGTCATAGATACTATATTTTTTAACCTCTCTTTAGCATATGTATA

>NF11217-F-Insertion-7

CCCAACAGTGGTTGCACATTGTTTTGATTAAGAAAATGTATAAGATTTGATAAATAAAAAATGTATGTTGGAGAGC  
GCAAGGGAGCTGCAGCCGAGGATCCGTATTGATCCACTGGTTAGAAAAACATAACCAATAGTTATACAATTTCTTT  
TTAACCAAGTGATTGAGATAAAGTGGTTAATGAACCTCACCAAGAATGAATTGTTTCGGAGCAGTGACGGAGCCCTT  
CATGAGCTGGGGTGGGCCACGGTCCACCCGAAAAATTAAAAAATCAACGATTATAGATATATTTTTAAGATATTTTA  
TGCAATTTTGTGTCGGTTTTATGTTTTTGTGATCCAAATTCCTGCAAAGTGGTGTAGTGGCCCAACCGAAAATTTA  
AATAATTCAATTATAGGTCTAATTTGCGAGATCTTATACAATTTTATGACGGTTTTAGGTTTTCGGTTGATCCAAAT  
CCCGCAAATTTGGTGTAGTGGCTCACCCGAAAAAGTTAAATAATTCAATTATAGGTCTAATTTGTGAACTTTAAAC  
AATTTTTCAATAGTTAATTTTAGTGGCCACCCGAACA

>NF11217-F-Insertion-8

CCCAACAGTTCGAAACCAAACATCTCTCGTTGTTTTCTTTTCATGTTGTTGTTTTCTGTTGCATCACATAGCACC  
GTGTTGTTGAATGCTTTTCTGAAAATGCCAACACAAACATCCGTAATGTGAACGGATTTAATTCATATACAATGTCA  
AGATAGATATTTTTTACGTTGTGCAAGAGACTTGTAAACCAGGACTAACCAGATTTGTACATTTATTCCGGGCTCA  
TTGTACAGAACATGTATATAATGTGGCTCAGAAGAGTTTATATGATGGTGTAGTTTTATAAAGAACGGTCTATAT  
AACTATATGTTGAGAATGTAATGTATCAAAATTAACCTCAATGTGAAAATAAAAAATAATAATAATAGAAAATGTGAA  
TTACCAAAAAGATACTCTGGCATTGGATCCTTCGCATTGATGTAACGATTTACAATAATGTCACCCAAAGAATGTG  
TTTGTGTTGTTGTGATGTTGAAATTTATGCTGGTGTGCCTCATGTGATTGATAAAAATGTTGATATTCTTCGACA  
TCCGAATCACTAGTGAATTCGCGGCCGCCTGCAGGTGACCATATGGGAGAGCTCCCAACGCGTTGGATGCATAGCT  
TGAGTATTCTATAGTGTACCTAAATAGCTTGGCGTAATCATGGTCATAGCTGTTTCCTGTGTGAAATTTGTTATCCG  
CTCACAATTCACACAACATACGAGCCGGAAGCATAAAGTGTAAAGCCTGGGGTGCCTAATGAGTGAGCTAACTCAC  
ATTAATTGCGTTGCGCTCACTGCCCGTTTTCCAGTCGGGAAACCTGTCTGT

>NF11217-F-Insertion-9

CCCAACAATCTGTTTCATCACTAAACCTTCTCTTGTGTTTTCTATCTTCTTGTGTTTTCTTCTTTGAATTCTGAGGTGTCT  
CCAAGCAACTCATGCTTTCAACATTTTTCTTTAAACCCTTCATGAATATTCTTCTTCTCCATCATATTATAT  
ATGGCTAAGGCCTAAGTTTTGAATTTTCGGAATTTGAAGGAAGATTTGTTTAATAATAAAAAAGATTTAAATTTGGT  
GAGGGGAATAGGATGTAGAATATATATAGCTAAAAAAGAATGTATGTCAAGGTTATTTGTATCACGTTATTGGAAC  
TTGTAAGGAAGGATCATAGTACTTATGGTACTAGAAAACGTGTGGTGTACTATCTTTTTATTGCTAGGTAGA  
AAAAACGTAGACCGTTACTTTTTCTCACTCTACGAGTTTCTCATGCGTCTATTCTAATTTTAACATTCAAAATATTT  
CAAACGCGTTTTAAGAATTTTTTATAGGCTGTCTGTATTGTTTCGGATTATATAACCTAAACTGCATAAAACACACGA  
GAAGCTCATAGAGTTGGAAAAGAAGCACTCAAGAAATTATCTTTGTTAGTTTACTTGTGTAGGACATCTAATGGCC  
CTATCTATTTCAATTTGTAGAAGGAACCTTTACTTGTACAGATTGTACGTTTCATGCCACACG

>NF11217-F-Insertion-10

CCCAACAGTCTTTTTTCAATGATAATGCAGGGGTAATGGCCTTTTTCCGGTTTTCTTTCTTCTACAGCTTGGTCATCTT  
TAGATCTAAAAGAACCTAAACATGATGCAGACAATGTTTAATAAACTTGATTTTTGTTTTGTTTTTTACTTAAAAA  
TGGAATTATGATTATAAATGGAGTGGTATGTGCTCATCTTTACCTGATAATCGCTTGGATATACTACTGAGAAGG

GACTTTGAAGATTTTGGAGCTGTCTACCTTGCTTTTGACCTTGGTCAATGAGGCCTCCGGGGTCTCACTCTTCTGCTC  
AGAGGTCTCTTGCAAATTAATTGAGAATGCAGCAGCAGCTACTGCTGCACCATGCACCATATCTATGTAGTCGCAAT  
CACGACCTGTTTTACTTGAAGCTGTTTTTGTAACTCACTGGCCCTTTTTCTTCTGCTGATAATGGTCAAGAC  
AGTTTTTACACAAGGTCAAATGAAATTTTATCCCTCGTTTTTCTGAACTTACTAGGCTGCTGATTGCATGCTCTTA  
TGTGTAATTGTCTAGACTTCATTTCTAAAACTCTTCAAATAAACCATGCATGGCATAAAGTTTTTTTTTTTTTTT  
TTTTTATC

>NF11217-F-Insertion-11

CCCAACATGCACCTTGTGGAGCAACATCTTCAAGTGTTCCTTCTCATTCTATATATTCCTTTTTCCAAAACAG  
ACTCTCACCTAAACTTCTCTTCTTCTGCAAAGTTCATGTCCATAAACTTGAAGTATAATGCTTTCGTCGGAAA  
CCTTCTACGCCATTACGGCTACCCCTTGTCAACCTTCTAACTCAGTTAATTTGTACGATGACATTTAGTTTCGAC  
GATGGTTTTGTGTGAAAATTTGAATTTTAAAGTGTGGAGAGATTTTATGGTTTTTAAACATTAGTTTTTTTTTATTTTTGA  
AGGAAAGGTTTTTAAACATTAGTTTTTAAAGTTCTTATTGATTCTCTAATGATTTAATTAATTTACTGAGAGTTTGA  
TTAACTTGTGGTGAATCAAATATTCAATGAATTGAAATAATCTTTGTCTAAATTGCGTTGAAATTTGTTTGGTGAT  
TAT

>NF11217-F-Insertion-12

CCCAACAACACATTGAGTCAACTTCTTCTTTAAGGAGACAAGAGACAACAAGGTTTGTAGTTTTTGTCTCAAGAA  
AGGGAAGGAGAATGAGGTTATTGATGTTGGAAGAGAGCTTTTGAAGTTGTGCAATAACGTTATTTTCGAGGATGATTA  
TGAGCCAACTTGTAGTGAATATGATGGTGAAGCTGAAGAGGTGAGGAAGTTGGTGAAGACACTGTACATCTTACG  
GGGAAGTTAATATTTCTGATTTTATTTGGTTTTTAAAGAACTGGGATGTCCAGGGGTTTAGCAAAGGGTTAAAGGA  
AATTAGGGACAGGTTTATTCTATGATGGAGAGGATTATCAAGGAGCATCAAGAAGTAAGGAGGAGGAGAAAGGAAG  
TTGGTGGAGGAGAAGGTCAAATTAAGGATCTACTTGATATTTTATTGGAT

>NF11217-F-Insertion-13

CCCAACAAATTTACTGTTTATCAAGGAATATATGTTTTAATTCTACTTCTTTATTGTTAATATTACTTGTAAATTT  
TAGTGAACCTCTGTATATTTTACGCAATGAAATTCAGTAATTGTATGTGTTAATTCTAATTCTTTACACTTTTTATAG  
TTATTTTATGAAAGTTAGCTAAATTTGATTGGATTTAGCACAGAATTTTCTCGGTCTTCTTTTCACTCAAGTGT  
GGATCAGTACTATGCCAATTTGTTATATCTCAAGTTAGAGATTAATTTCTTTCTATTCAATCAAATTACACCAAAGTG  
TCACTTTTATAGGGTAGTTTTTTTAAATATCTCCACAAATATC

>NF11217-F-Insertion-14

CCCAACAGAATCAACTTACTGGAAATCTTGGAGCAGATAATATGGCCACACAACATCAAGGTGCATATTCTTTGTT  
GGAATGGGAAGCAATGACTACCTAAACAACCTTATGCCTAATTATAACACCAAAAATCAGTACAATGGACAACA  
GTATGCTGATCTCTTGGTTCAAACATATAACCACCAACTCACTGTAAGATCTTTTGTCTTCTTACTCACTCTAAGT  
ACCTAGAACTACATTTTTGTCAAAGACTGTATGAAACACGGTCACTCCTCGGATTAGGCGTGTTCAGTGTGCGACA  
CCGTGTCCGTGTTTTGTA

>NF11217-F-Insertion-15

CCCAACACTATTCAAGAAAATAAGTGTATGTTTGGATTCAATTTTAGGATAGGCAAAAGTGATTATGAAAACCTTAAA  
ATAGATTTTAGTATGTTTGTGTTGTTTTTTTTTATTGGAAATGGTTGTCACTTAACTGATACTAGGATTTGTAGCTG  
TAGCCTGCAAACCTTACTTTTACCCCATATGAGTTCCTCGCATGTTTTATTAGGATTCTAAAATCCGAAATATTTT  
AACA

>NF11217-F-Insertion-16

CCCAACACACTTTTCTATCTCTGCACGCATTCCAAGGCAAATCTAGAAAGGCATTTTCCAACAACATTCTGAAGTA  
TGTGCAAATGACACTACACATGGAGAAAGCCCAAAAATTCATCTGACACGCATTAAATAAACCCAGGAACACATCAT  
ACATTCATGTTTGTGAACCTAGGTACAATGTCATGATGAACAGAACAACATTCTCCA

>NF11217-F-Insertion-17

CCCAACAAAAGCTCCCTAAATAGTTTACAATTTGTAAGTTTTAGCATGTTAAATAATGAGCTTAATATAAAAAGGTG  
GATTTTCCATGCCAACTTGGTCCCTCACTAGTTTCAAGAAACAAGAAGCCCAACTTTGCCTAACTTGTGAGCATG  
ATCAACCCACCTTATCCAATTTGTTTCTGTTGACAGTGTCTGAATCTAA

>NF11217-F-Insertion-18

CCCAACAAAGGATTAGGGAAGTCTATAGTTGCTTAAATAGGAAGAGACAGTGTAGAAAGAGTTGAATATCAGAGTGC  
CAAAATTGAAAGAGGATTAGTCAACCTTAATCAATCAGTGTGTATTGCGTATTTATAGATACGTTGCTGAATGTTGA  
TGATGAGAAGGGTATTTTACCTTGTGTATGTCTGCGCGCGT

>NF11217-F-Insertion-19

CCCAACAGCACAGTATTCAACATCAGAAGAATATCTAGAAACAGTAATTTGTTTTCTTGGTTCTCCATGAAATCAAAT  
AATTGCTTAAAAAGAAGCATTGTCCAGTTATAGAGCGCCAAGTATCAATACATCCAGA

>NF11217-F-Insertion-20

CCCAACAGGATTGGCAATTTCCAAAGAACTTGGACTGAGGTTGAGGGATTGGCAATTTCCCATATTCATTGATCCT  
TGATCAACTCATTATTTCTACACATAGGAATTCATGTGAGCTTGAATGTCTATTGACTTTCTTATAT

>NF11217-F-Insertion-21

CCCAACAGAACTCGCATGCGAAAGACAAGAACTCAAACGTGGCATTGTGCAAGAAATTAGAAACAATTTTATATC  
TACTTGAGTGGTTAGCTAAGTTCCATAT

>NF11217-F-Insertion-22

CCCAACAGAGGATAAATTGCCATCAACCTGTAGAAATGAAAGGGAGTGAGATTGAATTTGAAATTAATGAAGATGAT  
TAAGGAGAAGGAGAAGGGAGTGGGGGTT

>NF11217-F-Insertion-23

CCCAACAACACTGTATGGTTTGTGTTATGTTGTGAGGTTATTTTTGCTTAAATGCTACCTGATTGCTTTGCTTTGTCTA

>NF11217-R-Insertion-1

CATCATCATGTAACCTACCATGACAGAGCTAGTGTGTGGCATATTAATTTAGTGACCATGTTTTCTGTCTCTAAAA  
ATATTTCTTCTTTCACTAATCTCCTACAGTGAGGTAAATATAATTTCTCTTGGACCAAGCATAATCCCCTTATGTT  
AAATTTTTCTTATAACAAAAAATTAATCAAAGAATGGCAAAGTGGAAGATGAAAGGAAAAAAGCAGGAAAGAAC  
AAGGGAACAGTTAGCTACTATACATTTATGTTAAAGTGGTGAGCTTTCTTCTGCTGTTCCCTAGTTATGTAGGCTT  
CAATATGAAAAATATGATGTGTCTCTCAACTCAACCTAGAACTCTAGACTTTGTCCAGTGTATGAGTACTTTG  
CTGGATTGAGATTTAAATGTAGTGGACCATTAGTTTAAATCTTCCCCTATGTCTAACTCCAAGCTTATTCATATACG  
GGTAGCATTTTGGTGATATAGAATTGGTGATATTGGTGACATTTGAGGTTGGCCTGTGATTGGTTTGGGGATCTTGG  
AGTTTGCTCCTCTCAATGTCTCAGGTTCAATTCTCTCTAGTGCTAATTTGAGGGAAAAGTTGCTCTGGCTTAGAAC  
AGAGCCCCTATGGACGGTGAATTGGTCCCCTCAGATTAGTCAGTCCTTGGGATCGGACATCAAATTTTCCAAAAA  
AGAAAGAAAAAATAATAATTACCAATTACGGTTGACTAAAACCTAGAAGGAGGACAACCTGTTTCTTGATCTCAAG  
GGGGTAATATATAAATTTAGTTAAAATTAATTTCTGGAAGTATCTGGAGTTTGTGAGTTTGTGAGTTTGTGAGTTT  
GGCTGGCCTTAAAGAATCGAATTTTCTTCTTGAGATCGAAAGTTTTTTCTTTTTTA

>NF11217-R-Insertion-2

CATCATCAGTTGATAGAGTGTTTCATCGAGGCCACAGAAGAAATCAACTGCACATCACATGAAGACGAGGCCAGAAA  
ATCATCACTGTGATAGGAATCGGAAACCAACAGAGTATGCTCCGTTGCCACCACTGCCTCCTGATTTTACAATTG  
TCATTTCTGCTGATGCATCTTCAACGGCTACTGTTGTTCCCTCCACCCCTACTCCTTCTACTTTGATTCCGGTACTTTT  
TTTTATTTTATTTTATTTTAAAGTATCTGTGTTGTTGTTGTTGTTTATTTATTTGACTATGATTGTACTGTCAA  
ATATACTCGCTACTTGTTCAGTTTATCTTTCAATTCAATGTGATTTTCATGTTTACATATGATGATGACAAAATG  
TCCACCATGCTATTATGTTATGGAAACGCGTTTTACAGCAACCCACATAATTATTGAAGCTCTTTCTTCAATTGTTT  
TGACGTTAGGTATAAATTATAGGTTACCAATTTCTTTTTGTGCTTCTTTCAAATATCATGATGATATTGAGCAA  
CGTGCATCATACTTTAGGTGCAATCGTTGGGAGTGCCAAAAAATTCGGTACAATAGAAGCTAATCAAGTTTGTCTCAC  
TATTTAGCAAAATATACATTTTCTATTTCTTCTTATGATGCTTGGATTGAAGAAACACCTTGTATTGATGCAACCG  
TGG

>NF11217-R-Insertion-3

CATCATCAGAATCTTTTTTATCTTGTAAAAAATTGTAAAGTGAATTTCTCAAAGTGTCTTTTCATGAGAACATGTTCT  
GGGTGAATAAAAGAATCGTTGAAAAATAAACTTACAAAAATAAAAAATTTTTATATTTACTTATAATGTAATAGAT  
CAGAAGTAACTTTTAGGGTGTGTTTGGTTGTGATGAGAAGAAAGTAAAAAGAGAGAAATAGGTGAGAGAGAGTGTGG  
AAAGAGAGAAAAATGTGAGAAATAGAGTAAATTTGATGTATTATTTGGTATAAGAGAAAGAAGTGTGTCTGATTTTT  
GAAATGACAAAAATATCTTTATACTATATATACACATATATGTGTATTTTTATTTTATTTTAAATTAATTAAGGTCA  
AATAAATTCACATTTCCACTAAATAAAAAAATTCACATTTCCACTGTATAAAAAAGAAAATAATTTATTCACAAAAA  
AGAATTACGTCAATTAACGATTGCAAAGTAGTAATAATAATAACAACCTAAGTGAATACTATAATGTAATATA

TCCTTTTTTTATCCAAATATATATCCTATGAGATGAGAAAATAAAAATATCTTGCAAACCATCACAGGTTCTGCTCG  
TTCAC TGCC

>NF11217-R-Insertion-4

CATCATCATATATTTTAGATCGAATTTACAATATAAAATTCTTCTACTATGGAGAATTGGAAAATATTATAATCAAT  
CTATAATATCACATAGATATATTTAAAAAATATAACTGACCATTTCCATTGATCACCATTGAGACTTATATACTTCAT  
CTATTATTTTATAATACAACCTTGCAATGTCATGCATAATAGAATTTAGGCTTAAATAAGAAAAAGGTTTCATGTAAGT  
TCGCGCATTTTTTGTTTTAGTTATTGTATCTTTTTTTGTTGCGAAAACAACCCCTGTATTTACTTAAATATTTTTGACAT  
TCGTCCCTGCCGTCCATTTCCGTAAAAAAAACGCTTCTCTGGCTAACGGACTAATATGTGGCATATGATGAGCTG  
ACAATTGGCTATTAGAGGGACTAAAACCAAAAATGCAAATTTACATAGGGACGAAAATAAAAAACATAATCATCAA  
ATTTGAATTTTAAAACATATTATTTCCACCTTCTTCTCCTACTATGTTATTTCTCTCTTC

>NF11217-R-Insertion-5

CATCATCAATAGCCAGGGGCGGTTCTATGGCCTGGCGACCCCGGGCACTCGCCCGGGCTCCGGGCCAATTTTTTTTGC  
AATTTCTTGTGTAAATCCTTATGAATTTCTTACATAAACACCTATAAATTGGACAATTTCTTTACATTTTTTATTAT  
TTGCTTGCAATTTCTTATGTACACCCTATAAATGTGTTGCAAATTTTTTTTTGCCCCGGGCTTTACAATATTCCTGGC  
TCCGCCACTGGCTATAGCTCTATACATGTCAGATTTCTTGTGGTTTTAACTCTGAATTGGAATGATCTTTACCATTT  
GACAGTTACTGTGAATGAGGTTGAGGCTTTACTTGACTTGTTTAAGAACTAAGTAGTTCAATTATTGATGATGGCT  
GCATTCACAAGGTAAATTTATTTTAGTGCGAGTAGTACAAATCAACTAAAGACTGATTCCAAATATTTTCTCTATA  
TGAAGTATATTGCA

>NF11217-R-Insertion-6

CATCATCAACCACAAGATTTATGCGCAAATGGCTACTGCCTCCATCTAAAGAGACAAATTAATATCCGATTTCAAT  
TCTTAACTATATTTTATTTAGCTTTTGTCTCGAACAAAGATTAGTCTAGTGACCCCTTTTCTCAAAAAAAATTAGG  
ACAATGTGCAATTGATGATGGGAAAATAATAAACGTACCAGAGCAAGTCTTGCTAACGGTGAGCTTGTATACAAGGA  
CTATAAGGCCAATAATATGGATTGATCCAGAGGCTATGTAGAAAAAATGAGGGTCTGTGATAGTATGCTTTAGAATC  
ACCACAGCACAAAAGCAAGCAATATTTCCCAACAAGATCTTCACTTTTATTGACCTCTTACTCAACCATCCAATCAA  
AACATTCACTGCAAAATCCCTCTTTGATCCCA

>NF11217-R-Insertion-7

CATCATCACATAGCACCCCCACACACAAGAAATCTAGTGCGCATAATGTTGCGCCAAACATAGGTGGGGTTGTGCC  
AACAATGACCGTGAGATAGGAGCTAGACGGGAAATAGTGAGCTTTAAAAATTCGAGCTACCAAAGAGTCCCGATCAG  
TGATATATTGTTGCAGTGCGTAGACACACTCCATGATTCATCTACACCACAGAGTAAAAAAGTCCACCTTCTCTGTT  
ATTGCATCTAAATACTCTTGTTCCTTAAACCGTAAGACTTCTCAAAATCAAATTTATACAACAATAATTCTTCTTT  
TGACTTTGATTGA

>NF11217-R-Insertion-8

CATCATCATCCTGCTGGTATAGGATTGACACATCACGTGTGTACGTCTTATAATTGTGTAAAGCGAGAGGAAAT  
ATTGTAATGAAATGTGAGTAATTTTTTTTTTTGGTGAAGTAGCTGTTAAATCACACATTTAAGAGGAGTAATAAATC  
TAGGATTTGAATCTTAATCTCTACGTTAGTTCTTTTTAAGGAATTTATGTTTATCAACTTAGTTACATTTAACAAG  
ATAATAAGGGTAAATTTTTTTTTTTTCACTTATTAGGCGCCCCACTCCGTGCTG

>NF11217-R-Insertion-9

CATCATCATGTTTGGAGCCATATCTCAATGTTAAAAGTAAGAACTTAAGGTGTTAGCAGCCAACACTCGGTGGATTT  
AGTCCCACATCGGATAGATAGGATTCTTGAGAAGAGTTTATAAGGAGTATGAGTTAGGCCTGGATTTACGTGACATA  
AGGAACCTACAAATTATATGTGTGTGTCCCCACAAGACAGAACACTATCTATATATCTAAAGAACTTAGCAAATTT  
TGCCGGAACTTTACGCCAAGCTTTAATTGAG

>NF11217-R-Insertion-10

CATCATCATCTAATGTTTAAAGATGTCATTGTTGCGAATAAATTTAGATTACGGGAGTGGGTTATAATTGGAGGAGAA  
GATTATTTGTTTGTGAAGAAGAAAGTCTTTTGAATGTATGCATTGCTTGTAAATGTGATTTTGGCA

>NF11217-R-Insertion-11

CATCATCAACCCTCACCTGTGCCGGCCCCCTGAAGCAGCACCGCCTTCAAATGCACCATGGGCTGCTAGCGTGCAGAC  
ATCAGAGTTAACTTGGTCTCCGGTGCCCTCGCCCTCACCT

>NF11217-R-Insertion-12

CATCATCAACTCTAACTTCCACCTGGCCTTTTTTCATCAAATAAATATGTAAATAAATTGATCACTATCTCTCTCTT  
CATTATTGAC

>NF11217-R-Insertion-13

CATCATCATGAATTCTTATGATTGTAGCTGATATTAATAAATTTTTAAAAATCATTAAAGAAAACAAAACCACTTTACC  
ACCCCA

>NF11217-R-Insertion-14

CATCATCAGATCTGCCATGTCCTTTTCGCCGTGTTTATTCATTTTTGCGTCAGCTCAACTGCTACTGTGA

>NF11217-R-Insertion-15

CATCATCATAATACTCGCGCCCAAGAGCTCAACCACCACCCTCTATCACGCTTCAT

>NF11217-R-Insertion-16

CATCATCAAAGACTTCATCATTCACTGGAAAAAAGACTGACACCA

### III. TAIL-PCR FSTs obtained from two different Nod+Fix- NF11217 *Tnt1* mutant plants in BC<sub>1</sub>F<sub>2</sub> generation

NF11217-6-Insertion-1

CATCATCAAAGAGTTGGTTAAATTATTCCAAAAAGGAATGATTGGTTTTCAAACCTTGCCATTTTTATTTGTATATGAT  
ATGATCAGTTTTCCCTCATTACTCCACAAACGACAGTAACCTACAATTATCCATGGCAATGCAATCACCTTCCTCTT  
CATTTTTCTATGGATTCACTTACCAAGTGTTCCTCAGTTTTAGAGGAAGTGACACTCGGTATGGTTTTCACTGGAAAT  
CTCTACAAGGCTCTTACTAACAAGGAATCCACACCTTCATTGATGATAATCATCTTCCAAGAGGAAGCGAAATCAC  
ACCATCACTCATCAAGGCCATTGAAGAATCTAGAATTTTTATTCCAATTTTTCTACCAACTATGCATCTTCTTCAT  
TTTTTTTTGGACGAACCTTGCCACATGTCATTCACTGCTACGAGACAAAGGGTTCGCTCGTTTTGCTGTTTTTTGTTG  
GTGTGGATCCTACTGATGTGCGACATCATAACAGGTAGTTATGGTGAAGCATTGGCTGACCATGAAAAAAGGTTTTCA  
AAATGATAAGGATAACATGGGAGAGGTTGCAGCGATGGGAAAATGGGCTATGAGGCAAGTTGCTAACTTTGTCCGGC  
TACCATTTTTAGTCCCTTGGGTATCCCACTTTTACTTAAATCATATTTTTCTTTTTTATATTTTTCTTTCTTTATTT  
CAAATAAATTTCCCAATAATTCTCGCATGGTTGGCTTTAAATGTTGGTGGGTAAATTGGTAGTGTAATTTCCACTAA  
CCTTATCCTAATGGGGCATGTGATTAGGAAACCGAAATTACGAAGTTTTTAATTGGGGGAAGAATAGGCTCGCAGA  
TAT

NF11217-6-Insertion-2

CATCATCAAAGACTTCATCATTCACTGGAAAAAAACTGACACCACAACACCAGAAGAGACTACAGGGAAACCTGAC  
CCTCAAAGAGAGACTACAACAGGATCAAACAATGGGGAGACAAGTGCATATGTATTGGATGAAACTTTGATCGACAA  
GATCAAACAATGGGCAAATATACAGGAGAGAAGTGCAGCCGACAAGATCAAACAAGGTAATTGGAAGCAGGATTAC  
ATTGAATTTCTAACAAGAAAACACTCTCAAACATAACTAGAATAAATATTATCATCTCTAGAATCAAGCATTACAT  
GCAGTTTATATACTAATGAAAAACATTGTCAGCTGGTATGAGAAGTCTAAAGAGTTGATAGATTCTGGGAAGACAA  
GAAGAAGATAAAaGCCAAaCGCGAGCTAaTGAAGCAACAGTTTTCTCTCAGACACTCTTTATTAGGTTTCATAGATC  
TAATTCATTTTTGCTTTCTTTAAGCAGGTCATGAAATGCTTCCTTACCTAAAATTAGATAATGTTCTAGGTCTTGTT  
AATTACCC

NF11217-6-Insertion-3

CATCATCAGTACATACCTTACGTACAACCTCAGTGCAGGGGATTTTCATACCATTGTTTTCGTTGAGGAGATGAATCTG  
AAGATGGGTTTTGGTTGTGGAATTCCACCAGCAGCAGCACCAAAACCTGGTCCCATTTGACTACTACTCATGCTTGCA  
AATAAACCAATAGGATAAGGGTACCCTTGTGTTCTTTCATGATGGTTATTCCATTGAGAACCCTAAATTGGGAGAT  
TGAGAAAAAATTGTTTTCTTTTGTTCATCAAAGGGATTGTTTTTGTGATTCTTTGAAACCCATTATCAAAGGTGTGAT  
AGATTAAACCTTTTTGGTGTGTTGAAAAGGTTGGCGGAAATGCAGAGGAAGGAAGAGATGAGGAGAAGAAAGGTTGTG  
AGTGATTGTGTTTCTGTGAACACACATACACAACCATCTCGAGAGATGACAAGGTGGTTTTATTG

NF11217-6-Insertion-4

CATCATCATGTTTGGAGCGTCGTTTCTAACAGTGACATGTTTTCTGATGTTTGGATAATGAATGAATACGGGAATGAA  
AATTCTTGGACTATATTGTTACGGGTTCCCTCACATGAGAGATTTTGGTTTTATTGGCTATCAAAGGGTATTATATAT  
TTCAGAGGATAACCAAGTGCTAaTGGAGTTTATATCTTCGGGGAAATTTAGTTTGGTTATCTATGATTCCATaAATA  
ATACATTTAAGATTCTACAaTAATtCAAAaCAACAaCAaTGATAAAaTGGCaCCACCaCAAGtCTACGTTGAGAGTT  
TGATATCaCCTCAaCTGCAGCCTAgAGACTCGTCTTTTTCTTCgATGaAATGATCTTGTTAATTACC

NF11217-6-Insertion-5

CATCATCACCTCCGTCCCTTAATAAATAACCTAGTTGATAATATGCATTATTGACTTGATATACTTTGACCATACTT  
TTCTACTAATTCACAAAGATAAAATTATATCATGTAAGATGTTGTTGGATTTCGTCTCGATGAGTATTTTTAAAATATT  
AACTTTTATAATTTTTTTTTAGTAGAGAATTGAAGATATCAAAGATAAAACATATGCTTGGTATGTGTGTCTAGAGTC  
AACTAGGTCTTTATTAGGGACAAGGGATATTGGGAAGGAAaTGGAACTGCCTTTGACATGATATGCTACAAAAATGA  
CATCTTGACTCTGTAATAAATCGGAATATAATTGTTTTTGTATTACGATT

NF11217XR108 9a-Insertion-1

CATCATCACCTCCGTCCCTTAATAAATAACCTAGTTGATAATATGCATTATTGACTTGATATACTTTGACCATACTT  
TTCTACTAATTCACAAAGATAAAATTATATCATGTAAGATGTTGTTGGATTTCGTCTCGATGAGTATTTTTAAAATATT  
AACTTTTATAATTTTTTTTTAGTAGAGAATTGAAGATATCAAAGATAAAACATATGCTTGGTATGTGTGTCTAGAGTC  
AACTAGGTCTTTATTAGGGACAAGGGATATTGGGAAGGAAaTGGAACTGCCTTTGACATGATATGCTACAAAAATGA  
CATCTTGACTCTGTAATAAATCGGAATATAATTGTTTTTGTATTACGATT

NF11217XR108 9a-Insertion-2

CATCATCAGAACATACAGGGAGAGACAGATGGAACCTGTACATAGTCCCTAGTCCACTCCCACGACCACACTTGTATC  
TCCTCCACCACTTCTTCAATAGACTCAACACCATCATTGAAAATTCTGAGTTAATCAAAGTCAGACTCTCTCTAATT  
GACAATTGTCTACTTTTTCCAACAAGTAGACAACATTTTTCATCAACGACGACACAATAGGCTTCCAAGTATCAACTCT  
CCTTAGATTGGCACCATCAAATACCCAATTAATAGGAAATTGATCAATATAACAATGTAAAAAaTCCAAAGGGC  
ACCATCAAAAAaTCATCGTTAATATTCAAaCCAAAAATATTACTTTCCCGAAaTCAaTGCAAAGAtTCTAGTAACAG  
AtTTAAGACACCATAAATtCTCTCAaTTCCcTTCACAAaTAAAAAaGtATCATCCGCAATCGTAAaTAGgaAAAG  
ATCGATGGAGTtATCATGAAACACCTCTTCAAAGAGCCGATTTCCACCATTTTTGCTACCAAACCTCGTCAATATCCT  
TCCTCTAATGAAATCTCACTACCAAGGTGTTTACAAAGTGTTTTCCAACCCAATAACGTTAGCCTCTAAAATTACTA  
AAAGTTTCCTCTTTGGTTTGAACAAGATTAACACACAA

NF11217XR108 9a-Insertion-3

CATCATCAGTACATACCTTACGTACAACCTCAGTGCAGGGGATTTTCATACCATTGTTTCGTTGAGGAGATGAATCTG  
AAGATGGGTTTGGTTGTGGAATTCACCAGCAGCAGCACCAAAACCTGGTCCCATTGACTACTACTCATGCTTGCA  
AATAAACCAATAGGATAAGGGTACCCTTGTGTTCTTCATGATGGTTATTCCATTGAGAACCTAAATTGGAGAT  
TGAGAAAAAATTGTTTCTTTTGTTCATCAAAGGGATTGTTTTTGTGATTCTTTGAAACCCATTATCAAAGTGTGAT  
AGATTAACCTTTTTGGTGTGTTGAAAAGGTTGGCGGAAATGCAGAGGAAGGAAGAGATGAGGAGAAGAAAGGTTGTG  
AGTGATTGTGTTTCTGTGAACACACATACACAACCATCTCGAGAGATGACAAGGTGTTTTATTG

NF11217XR108 9a-Insertion-4

CATCATCATGTTTGGAGCGTCGTTTCTAACAGTGACATGTTTTCTGATGTTTGGATAATGAATGAATACGGGAATGAA  
AATTCTTGGACTATATTGTTACGGGTTCCCTCACATGAGAGATTTTGGTTTTATTGGCTATCAAAGGGTATTATATAT  
TTCAGAGGATAACCAAGTGCTAaTGGAGTTTATATCTTCGGGGAAATTTAGTTTGGTTATCTATGATTCCATaAATA  
ATACATTTAAGATTCTACAaTAATtCAAAaCAACAaCAaTGATAAAaTGGCaCCACCaCAAGtCTACGTTGAGAGTT  
TGATATCaCCTCAaCTGCAGCCTAgAGACTCGTCTTTTTCTTCgATGaAATGATCTTGTTAATTACC

NF11217XR108 9a-Insertion-5

CATCATCACCATCTGCCCAACAAGTCTCCGTTGCTACTAATCCACCTGTTGCCATATGACAAGTACCCCTGTTGTGG  
CTTTTTCCATCTACTATATGCCTCTTGTTAATCTCCAAATTCTAAGTATTTTGCTGCTTTTTCTTTTGGCATTTCAA  
AACAACAGGGAACATAAATAGCTTGTGGATTGTTGCCAGGCATATTCCAAAGCTGCTTACTTCTTCTTCCATATA  
TTCCACAACACCATAGTTAAACCATTATAATCATTGTTGTGCAGTTGTTGATGACAGTAAAAATAAACTCTGCACA

TGATGAAAATGTCCCCTGCATGCGTTTGAATTTGAGGTCATAGGTCCTATTCCCCTAAGCTGTTGTAGTTTTCTTGC  
CATTCAAAGAAGATATGCCTTAGGAGGTGCTGTGTGTAGGAAGGGAAAGAGTGACTTCTGTCCCTTTTTTGCAATCCA  
CTTGTGTGCTTTTAATTCTCTAACGGTCACAGGTTCTGCTCGTTCACTGTCTTGT

NF11217XR108 9a-Insertion-6

CATCATCATTAAAGCTGCGTCATGGAACCAAACCATGAGGGAACATTTCCAGTGAGTTGATTGTACAACAAGATAATT  
TCTTGAAGATTGGTGCAATTGGTAAGCTCAATAGGAATCTTACCATGAAAATTGTTCTTGCTCAAGTCAAGAATTG  
CAACCTCTTCAGAAGACCAACTTCTTTTGGAAATTTACCATGCAAATTGATGTTGGAAAGTTTGAGTATTCTCAGAA  
ATGTTAGATTTCCCAACGGTGGTTGAAGAGTACCACCCCAATTTGATTTTCCAATGCAAGACAGAGACTCTCATGTG  
GCGTCGACCGCATGTACACCCTCTTACAGAATGAGAGATCTTCTGATGGAGATATCAGTATACATGGTAGTTTT  
CTTCAAGAAGCAAGCTGTTACAGCACTGACTCAACTCAAGCAGACACTGTGTGACGCTGAGACACAGCATGGGATGA  
GTCTCATTTGCAGTAGGGATGGGATATGGAACACATATCTGGGTGTTGTGATAATAAGAA

NF11217XR108 9a-Insertion-7

CATCATCAGTATGATAAATGATAAATATGAAACATAAAAAGAGAAAAGTGTGTTTTAATTAGAAGTTAGGTGACGGC  
AGTGACGACGACGGAGGGAGGAAGAGGAAGAGGAGGAGGATTTGAGTCATCTCAATGAAGACCCAGCAGAATAC  
AAAGATGTGAGAATAAAAGTTTTATTTTTTGTGTGCGACAAAATTGAAATGATGATCTCAATATTATTTTTGTAA  
AAGTAATAAACTGTTTTGTAAATGCTATTCCAAAATTAATTTGTTAATTTTGTCTGAAGAATAGAAATGTTTTGGA  
GTCTTTATGATCAAGATTCATTTTATACTTATATTTTTATTTTTTTAATAATTTTTATTTAAGTTCTGCAATTTCTT  
GACCTATGTTGGACTTATCTCTATTAATAAGGAATTTTTTTAAAAAAGAATAAGGTTAATGTTTTCTTGAAGGGAG  
TATTTTTTTGGAGGTTAAGGAAATTA

NF11217XR108 9a-Insertion-8

CATCATCAAATCCCTCAACACTTGGCCAATTATTCTCCGTGTATATTTCCATACTCCTTCTCATTCCCAACTTT  
TCTGAAAATGTTCTCTTAGGCCTATAAAAACCTACCTTTTGTCAATCAGATCCATATTCTCAGTTCCTAACCAAA  
ACGCCATTCTCTTTTTGTTCTCTCCTCTCaAATTAAGTGAATGGCAACAAGAAAAGCAAAGCCATAGGCATTGAC  
CTTGGTACAAGCTACAGCTGCATTGCAGTGTGGCGAAACAATCGTGTGAGATCATTCCAACGACCAAGGGAACCG  
TGTACCCCTTCTTACGTTGCCTTACCAGACTGAAAGATTAATAGGCGATGCTGCCAAAACCAATTAGCCAAAAA  
TCCCCACAACACTGTTTTTGTGCAAAACGTCTGATTGGCCGTCGATTCTCTGACCAAAACAGTCC

NF11217XR108 9a-Insertion-9

CATCATCACATTTTCTGTTTTACTGTTTTCTGAACCCACAGTGTTCAGTTTCTGAGACAACAGTGATTCTAAACATTGG  
CATTGGATTTGGACCATCAGATTTGCTTCAAACCAATTAATCCAATCCACCATCAGTACTGTACATACCTATCAGT  
ATTCTGTATATGAACGTGTGTGGTATGGAATTCAGCAAAAATATATATAAATAAAAACAACAATATGTATAGTAT  
TTCATGCACACTATAGACTTGAATTGAGATAGTGTATATGCAATCTTTGTAAAAAAGAATAGTTGTTATACATC  
TAACTGAAAGAGAAGTTATTAAGTAGTCGATAAAATAAAAGACAATAAAATTAATACTACTTCTCCTCCCAAGA  
ACAATAAAGGCAAAAAAAAAAACTCTGGGCGTCCTAAACCTCCAACAAAACCTCT

NF11217XR108 9a-Insertion-10

CATCATCAGTTGATAGAGTGTTCATCGAGGCCACAGAAGAAATCAACTGCACATCACATGAAGACGAGGCCAGAAA  
ATCATCACTGTGATAGGAATCGGAAACCAACAGAGTATGCTCCGTTGCCACCACTGCCTCCTGATTTTTACAATTG  
TCATTTCTGCTGATGCATCTTCAACGGCTACTGTTGTTCTCCACCCCTACTCCTTCTACTTGAATTCGGACTTTTT  
TTTTATTTATTTTATTTTTAAGTATCTGTGTTGTTGTTGTTGTTTATTTATTTGGACTATGATTGTACTGTAAATATAC  
TCGCTACTTGTTCAGTTTATCTTCAATCATGTGATTTTATGTTACATTGATGTGACAAATGTCCACATGCTATTAT  
GTATGAAACGCGTTTTCT

NF11217XR108 9a-Insertion-11

CATCATCAACAATTAATTTAAATGTTGAAAATTAAGAACAATTTCTCATTTTTCTTCTCACACCCCTTCTTCTT  
GAAGACCACACCTCCCTCTCTCCACCTCGACACCGACCGCAACCTCAATACAACCATACGCTACCTCCGCGCTTA  
CACAGCCACCACCACCACCACCATGATCCCTTACCCTCATCTCCTCCTCCTCTCAAAAACCTCCCTCATTACT  
ACCCACTCGCCGCCCACTCCGCTACCACAACCACCGCCTCGAACTCTTCTGCTCCAAAAGCCAAGACAGCGTTCTT

CTCATTACGCCACCGTAGACATCACTCTCGAATCCGTAAACTACCTCGACGACGCCATCTTCCCATTTTTGTTT  
GA

NF11217XR108 9a-Insertion-12

CATCATCAGGTGTGATGCTCATGTGAGCAAGGTTTCCGTCAGATATATCATTATCATAAAAATGAGAAGTGTTATGA  
ACACTCTCTTTTAAATACGATATCTAACACTTTTTTATTGGATAAAATTAATTTAAATCTCACACTTTTTAAATGGT  
GCCTACATAGAGTGGAGTAACCCATATGAGTTTCATCTAACAAAGAATGTGAATGTTAGATTGATGTATCCATGTAAT  
ATGGTAGATTAAATATGGGTTATTTTGAATTTGATGATACAAAGAATTTATCTCAAGTTTCAAATGGCAATTTATAC  
ATCAATGAATCAAATACAATGTGTTGGGGTTAAATTGTGTCCACAAGAATA

NF11217XR108 9a-Insertion-13

CATCATCACATACATCTATGGAAGAACTAATTTTCGTACAACCTATATTTTTTTATAGAAAAAATTGAGTGGATCATT  
ATTTTTTTTTTTGAAGGATCATTATAGCATGCAGAGATTACTTGTTTAAAATaCTTTCACATTCTTACCTTGCAGAA  
ATCATTCTCTTATATCTAGTGTATGTGTGCaTTTCAAaCATCAGTTGGTGACaTCTTcTATTCTTGTTAATTACC

NF11217XR108 9a-Insertion-14

CATCATCAGATCTGCCATGTCCTTTTCGCCGTGTTTATTCATTTTTGCGTCAGCTCAACTGCTACTGTGATTTTTCTT  
GATTGATACTCATACTTTTATCAAAGTAGAGTCATTTAAAATCTTATTATCTGCATATGATTTGTATTTTTATC  
TACATGTATTAACACTTGAGTTTCCCATAAAAAACAATCTC

NF11217XR108 9a-Insertion-15

CATCATCATGTGCCTCAGCTTCTGCTACATGTGAACTGCAATGACTTCTCCACTTTCTCAAAGATCTCCATGTGCAA  
TGCACCAAGCTTCCAGTTTAGGTTTGTGACAAGTAAAGAGATCTTACATGGCTGCTAATCTAGTCTGTCAGGAAAG  
GATCAAACACTGGAAATTGATTGCC

NF11217XR108 9a-Insertion-16

CATCATCAACCCTCACCTGTGCCGGCCCCTGAAGCAGCACCGCCTTCAAATGCACCATGGGCTGCTAGCGTGCAGAC  
ATCAGAGTTAACTTGG

NF11217XR108 9a-Insertion-17

CATCATCACTGAAAACCTCTCATTGTTTTACAGGTTCTGCTCGTTCACTGtCTTGttAATTACC
