# Supplementary material for: Rapid identification of causative insertions underlying Medicago truncatula Tnt1 mutants defective in symbiotic nitrogen fixation from a forward genetic screen by whole genome sequencing
Source: PubMed Central journal article supplement (PMC4769575; doi:10.1186/s12864-016-2452-5), 2016-02-27
Supplement: 12864_2016_2452_MOESM3_ESM.pdf [file 12864_2016_2452_MOESM3_ESM.pdf]

**Additional file 3: List of sequences of all NF10547 flanking sequence tags (FSTs) obtained from R<sub>0</sub> and R<sub>2</sub> Generations by TAIL-PCR.**  
(Veerappan et al. 2015, submitted to BMC Genomics)

\*The signature refers to the *Tnt1* border sequence flanking *M. truncatula* genomic sequence and its location at the 5' or 3' end of the individual sequence, if listed.

**I. NF10547 TAIL-PCR FST sequences (R<sub>0</sub> Generation) obtained from *Tnt1* mutants database (<http://medicago-mutant.noble.org/mutant/>)**

>NF10547\_high\_1 signature: TGAGATGGACATCATCA 5' end  
TGAGATGGACATCATCAGGATGCATATTAGGATAATTTTAAATCATAATATTCTATACTTATTAAGTTTGT  
TTGTGATTTTCAAATAGACCCGCGTTCGCACGGGTCAAATCTTAGTAATTAATTGGTTTATAGCACAAGGG  
TTTCAAATGAATTAGGAGCTGGTAATCCATTTGAAGCACGTGTTGCCGTGTTAGTTGCTATGTCACCTTGC  
ACTCACTGTAACAAGTATAGTGAGCGCAACCCTCTTTGCATGCTGCCATGTTTATGGCTACATTTTCAGT  
AGTGATACAGAGGTTGTTAAATACATTACTGTCTTGGCTCTTCTGGTTTCTATATCTGTTATACTCGATA  
GCATACAAGGCGTCTTCACAGTTCTGCT

>NF10547\_high\_10 signature: No signature  
CTGCTGCTTCAAGTCTCTTTCTTCTCTCATTCAAACCTTATCAGCCCAGGAAAATTGATTTTCCAAAAC  
CATTCCCTTGTGCATCGTCAGTTCAACTTCAATGGCAAAATTTCACTATTAATAATGAAGAACCGTGTATGA  
GGTAGTAGATCCCCCATAACGATAAAAAAATAATTCATACAAAATTCATTGAGTTTGTGCTTC

>NF10547\_high\_2 signature: No signature  
GGCAGCAGATCCAGCAGCACGGAGGGGAAGGAGTTTGGCGGAAGTGAAGAAGAGGAGGGGAAGCAATCCAT  
CTGGCAATGGAATTTCCAATGTCGACGCTGGGACCCTCAGGACCCAAGGAATTACCAGTACCTAAAGTAA  
TAGAAGCTGCAATAGCCTTTAAGAAAGGGTTGGAATTGGAATTGGAAGAAGGTTGAGAAGAGAAACAAG  
AAGACCTCCAAAAGCGGGAACAAGTATTACACTTTTCCATGTTTCTTGAATAGGAGCTTCTCTCAACCAT  
GAGGCACCTGATGATGTCCATCTCATTGCGC

>NF10547\_high\_3 signature: TGATGATGTCCATC 3' end  
ATTTATTAGTAAATTCACCACCTGCATAGATCAACACAATGCTTATGTATTTTTTCTCTTTTAAATAGCCA  
AAATTTTATTAGAACTCAAACAGTGCATCAATAATACACCAACTATATTAAGTGCAGCAATTTGACAG  
AATAACAGTTTGGCACGTCTTGGTTTTCGGCAAAAACACTACTTTGAATCTTAAACAAAACCTCGATGCCA  
TCGTGATTTTGTCAAATATATTGATTTTTTGGTTCGGAGTACCCTTGATACTATTGTTAATTATGATGATG  
TCCATC

>NF10547\_high\_4 signature: TGATGATGTCCATCTC 3' end  
AGAGGAGAAGCAAAGGAACGATGGCTGCTTTCGTTTTTGTGCATCAAGTTTCTTAACCAGGAACCTTAAAT  
TGGTGATACTAGTTACCGAAATCAAAGTATAGTTGGAAAAGATTTCGTTCAATCATTTCATTTATGGTGGG  
AAGAAGTGGAGCGTTGGATCTACAGGCAAGTCTAACATTTTGCCTAACGTTACTTTTTCTTCAATCAAGA  
TTAGATCAACTGAAGTGGGAACAGGAACGCGAAGAAAGGAAGTTAGATATGATGATGTCCATCTC

>NF10547\_high\_5 signature: TGATGATGTCCATCTCAT 3' end  
ATGTCCATCTCATTGACGGATCGTAATAATAATAACAACAATAATAATAACTTTGAAGGTCCTT  
AGCTTGAGCTTGATATCAAATCACCGATAGTCTTGTAGCTGCATATTGTACATAACATTTTGTGTTGGG  
TTGTCTCCAATGGAGAATTTGTCCAATCACTTTATCATGTTTCAATTTCTATGCATATTATATTGTTGAT  
GAAATGCAAATCCTTAATGCCAGTTTTTGGTTCGAGCATCTGTGTTGATGATGTCCATCTCAT

>NF10547\_high\_6 signature: TGATGATGTCCATCT 3' end  
ACACGGATTGCCCGTCTAAACACTGATATTTGTTTTTTTAAAGGAAAACACTAGTATATTTATAATTCAA  
GCACAACAACAACGTAGATTTTTTTTAAATATATATAACAATGTAGAAATTGTTTCAAAAAATATTTGT  
TATTGTTGTGAACCTTTGAGATTTTTTGGGTGTACCGTTAATGTTGAGATTTATTTTCACTTCCCTAAGT  
TTTTTTTAAAGTACTTTTTATTATGTTAAAGAAAATGATGATGTCCATCT

>NF10547\_high\_7 signature: No signature  
TTATGGATCTTCCAATATTTGGATTGATCATCTTTCACTCTCTGAATGTGAGGATGGTCTTGTGGATGTT  
ATCCAAGTTTCTACTGGTATCACAATCTCAAATTGTCACATGACAAAACATAATGATGTAAGTAACCTTTG  
GTTTGTAAAATGAAAAAATGAAATTTTATATGATATTTAATTTCTGCAAATGTATATACATGGCCTA  
CATTACTTAAAATTTCTGGGTCCGTCTCTGCTTCTCCACT

>NF10547\_high\_8 signature: No signature  
TGGTGAATTTACTAATAAATGCATTTTCTTCTTCTTGATCTTTGTAGGTGGTCAATTTACAAGCACAGCT  
AGCTTTTCTGAGAGAGCAAACAGCTCAAAGGTGTATCAATGCCCAAATTTCTGCAAACCCTAATGAGAAG  
AACTTTGGAAAACCTACTAATATTCTCCCTCAAGATCTTCAAAGTTGGTTCCAGATGGAAAATTTCCAACA  
TGTGTTCTCAATTTCTTCCCGATTTCTCTGCTACTCCACT

>NF10547\_high\_9 signature: TGATGATGTCCATCTCA 3' end  
AAAATAAAGATAGTGGGAAACAATTTATAAAGACACAGATAATTTATAAAGATGAAACAAGAAATAGAAA  
ACAAAGACGTGTTAATCACA AAAACATAAAGAAGGCAACAAGTGTACTTTGCTGAAGATCAAATACACCAC  
TAACCTTCAAGTAAAAAATTATACACCTAACAAAGAAAGTACAAATTTTCAATTTGGGTATCGACGAGTTTT  
ATGGAGGCCTTTTGATGATGTCCATCTCA

>NF10547\_low\_1 signature: ATGAGATGGACATCATCA 5' end  
ATGAGATGGACATCATCACTTTCATATGTATATTTCCAATGGTAATTACAATGGAGTAGCTGATTGAATTAT  
CATTTGATTGTAACATTATTTGAACATTTATGCCCGTATCAGTGCCTTTTTTCTTTATATATATCATTTG  
TTTCTGTCTCACTTTGCTTGTATTTGTTATACACAGATTTCAAAGTCGTTTATGGAGGGCAGAATTTCT  
CTAGAAAAATACATATCTTCTTTGAAGTCTACTGTTGGAATAAACGTTCTTGTGGAAGCAGTAGGGATTG  
GTAACAAGAAGGGAGACCTTACTAGGCTTGGTGTGCAACCTGGGAAGAACAGTCGGACGTTTTTCAGCACC  
AACTTGCAAATCTTTGTCTTCTTGGACCGAGTGATATATTACAATCTCTGCTTCTCCACT

>NF10547\_low\_10 signature: AATGAGATGGACATCATCA 5' end  
AATGAGATGGACATCATCAGAGCTCAAGGGATGTTTGGTTTGGCATCTTTCATGACCGTGGAAATGGTTA  
TGTTAATTAATCTTGCTTTCCTACTGAAGGTGATTTTGTCTGGTAGTACTCTTAGTATGCTTGGAAAGGAATCC  
TGTCCAAGACACGGTTAGAGAAGTGCCTATTGTCTGGCGGCACCGGCTTGTTTAGGTTTGTAGGGGATAT  
GCTATTGCTAAGAGTGTGGGAGATTTCAACATCTGAGCATTTTGTGTTGAGTATGATATCTCTGCTT  
CTCCACT

>NF10547\_low\_11 signature: TGATGATGTCCATC 3' end  
ATTTATTAGTAAATTCACCACCTGCATAGATCAACACAATGCTTATGTATTTTTTCTCTTTTAAATAGCCA  
AAATTTTATTAGAAACTCAAACAGTGCATCAATAATACACCAACTATATTAAGTGCAGCAATTTGACAG  
AATAACAGTTTGGCACGTCTTGGTTTTCGGCAAAAACACTACTTTGAATCTTAAACAAAACCTCGATGCCA  
TCGTGATTTTGTCAAATATATTGATTTTTTGGTCTGGAGTACCCTTGATACTATTGTTAATTATGATGATG  
TCCATC

>NF10547\_low\_12 signature: TGATGATGTCCATCTC 3' end  
AGAGGAGAAGCAAAGGAACGATGGCTGCTTTCGTTTTTGTCTATCAAGTTTCTTAACCAGGAACCTAAAATT  
TGGTGATACTAGTTACCGAAATCAAAGTATAGTTGGAAAAGATTTCGTTCAATCATTTTCAATTATGGTGGG  
AAGAAGTGGAGCGTTGGATCTACAGGCAAGTCTAACATTTTGCCTAACGTTACTTTTTCTTCAATCAAGA  
TTAGATCAACTGAAGTGGGAACAGGAAGTGCGAAGAAAGGAAGTTAGATATGATGATGTCCATCTC

>NF10547\_low\_13 signature: TGATGATGTCCATCTCAT 3' end  
ATGTCCATCTCATTGACGGATCGTAATAATAATAACA AAAACAATAATAAATAACTTTGAAGGTCCTT  
AGCTTGAGCTTGATATCAAATCACCGATAGTCTTGTAGCTGCATATTGTACATAACATTTTGTGGGG  
TTGTCTCCAATGGAGAATTTGTCCAATCACTTTATCATGTTTCAATTTCTATGCATATTATATTGTTGAT  
GAAATGCAAATCCTTAATGCCAGTTTTTGGTCTGAGCATCTGTGTTGATGATGTCCATCTCAT

>NF10547\_low\_14 signature: TGATGATGTCCATCT 3' end  
ACACGGATTGCCCGTCTAAACACTGATATTTGTTTTTTTAAAGGAAAACACTAGTATATTTATAATTCAA  
GCACAACAACAACGTAGATTTTTTTTAAAATATATATAACAATGTAGAAATTGTTTCAAAAAAATATTTGT  
TATTGTTGTGAACCTTTGAGATTTTTTGGGTGTACCGTTAATGTTGAGATTTATTTTCACTTCCCTAAGT  
TTTTTTTAAAGTACTTTTTATTATGTTAAAGAAAATGATGATGTCCATCT

>NF10547\_low\_15 signature: No signature  
TTATGGATCTTCCAATATTTGGATTGATCATCTTTCACTCTCTGAATGTGAGGATGGTCTTGTGGATGTT  
ATCCAAGTTTCTACTGGTATCACAATCTCAAATTGTCACATGACAAAACATAATGATGTAAGTAACTTTG  
GTTTGTAAAATGAAAAATGAAATTTTATATGATATTTAATTTCTGCAAATGTATATACATGGCCTA  
CATTACTTAAAATTTCTGGGTCCGTCTCTGCTTCTCCACT

>NF10547\_low\_16 signature: No signature  
TGGTGAATTTACTAATAAATGCATTTTCTTCTTCTTGATCTTTGTAGGTGGTCAATTTACAAGCACAGCT  
AGCTTTTCTGAGAGAGCAAACAGCTCAAAGGTGTATCAATGCCCAAATTCTGCAAACCCTAATGAGAAG  
AACTTTGGAAAACCTACTAATATTCTCCCTCAAGATCTTCAAAGTTGGTTCCAGATGGAAAATTCCAACA  
TGTGTTCTCAATTTCTTCCCGATTTCTCTGCTACTCCACT

>NF10547\_low\_17 signature: AATGAGATGGACATCATCA 5' end  
AATGAGATGGACATCATCA CACCAAACCTCAGTTACGGTTAATTCAACCGTTGAGGTTATGTCATTTCTG  
CATCGAATCGGAACTTTAGGCTGAATACCGAGAGGACATTTCAATTTTCGCAGATGTTACACTCACCTGC  
TTCATGCTTCTTTCTCAAATTCTATTCCCAAACCTAAAACCTCTCCCTACTGTTATGCCATATTCGCATTC  
GCTTTTCCATAATACTAGACCCATAAATGTTT

>NF10547\_low\_18 signature: TGATGATGTCCATCTCA 3' end  
AAAATAAAGATAGTGGGAAACAATTTATAAAGACACAGATAATTTATAAAGATGAAACAAGAAATAGAAA  
ACAAAGACGTGTTAATCACAAAACATAAAGAAGGCAACAAGTGTACTTGGCTGAAGATCAAATACACCAC  
TAACCTTCAAGTAAAAAATTATACACCTAACAAGAAAGTACAAATTTTCATTTGGGTATCGACGAGTTTT  
ATGGAGGCCTTTTGTGATGTCCATCTCA

>NF10547\_low\_19 signature: No signature  
CTGCTGCTTCAAGTCTCTTTCTTCTCTCATTCAAACCTTATCAGCCCAGGAAAATTGATTTTCCAAAAC  
CATTCCCTTGTGCATCGTCAGTTCAACTTCAATGGCAAATTTCACTATTAATAATGAAGAACCGTGTATGA  
GGTAGTAGATCCCCCATAACGATAAAAAAATAATTCATACAAAATTTCCATTGAGTTTTGTTGCTTC

>NF10547\_low\_2 signature: TGAGATGGACATCATCA 5' end  
TGAGATGGACATCATCATAAAGAAACCTTAAGATTGCACCCACCTAGTCCTCTACTACTACCAAGAGAGT  
GTATTGAACTTGTGAGATTAATGGATACACAATATCATCTGGAACACAAGTGTGTTGTGAATGGATGGGC  
AATGGAAGAGACAAAAGTATTGGAGGGAAGGAGAAAAGTTTTATCCTGAGAGTTTCATGGATTGTCTA  
GTTGATTACAAAGGGTCTAATTTGAGTACATACCTTTTGGTGCAGGAAGGAGAATATGTCCAGGAATCAC  
ATTTGCTGAACCTAATTTAGAATTTCTTGTCTCAATTGTTGTACTATTTTATTGGGGACTTCCCTAT  
GGAATTACTCATGAAAATTTGGATATGACTGAAGTCTCTGCTCCTCCTCA

>NF10547\_low\_3 signature: TGAGATGGACATCATCA 5' end  
TGAGATGGACATCATCAGGATGCATATTAGGATAATTTTAATCATAATATTCTATACTTATTAAGTTTGT  
TTGTGATTTTCAAATAGACCCGCGTCGCACGGGTCAAATCTTAGTAATTAATTGGTTTATAGCACAAAGGG  
TTTCAAATGAATTAGGAGCTGGTAATCCATTTGAAGCACGTGTTGCCGTGTTAGTTGCTATGTCACCTTGC  
ACTCACTGTAACAAGTATAGTGAGCGCAACCCTCTTGCATGCTGCCATGTTTATGGCTACATTTTCAGT  
AGTGATACAGAGGTTGTTAAATACATTACTGTCTTGGCTCTTCTGTTTTCTATATCTGTTATACTCGATA  
GCATACAAGGCGTCTTCACAGGTTCTGCT

>NF10547\_low\_4 signature: No signature  
TAAATGTTTCTCCAATTGTTTTAAACAGCGTGAGGTGTTATGCTGCACCCGTTCCAGGTAATTTACAACT  
TCTAGTAGTTGTAAGTAGGGCTTAATTATGAACAAAGAAACCTTAATGCATGAATGTTTCTTAGAAACAA  
TCTCTTTTCAACACTATCAAATTTGTCATCTTTGCTATTGGGAATATGTTCCATGGTGATTTTGGTATTG  
TGACAATCTGCGTCTCTTGGTTTTATTGATGTCGCGCATTTTGTGTTTGTGCCTTCAGTAAGCTTGAGCA  
TTATCCTTACGTTATGTGTTTGGTAGCTTTGCTATGTATTGGTGGTGTGGTTGATGATGTTTTTCTGT  
GTTTTCTCTTTCATCTCACTCGACC

>NF10547\_low\_5 signature: TGAGATGGACATCATCA 5' end  
TGAGATGGACATCATCAATTTCTAATTTTATAACAAATTTTTCAGGACAACAATACAAATTGAGTATCAAC  
AACTATTTTTTATTAATATATTTATTGCTCGTTTTCCATTTTAAATATAAAAACCTTAGAGATATTTTATA

ACTAATTGCAAGTTCTCGTGGTGTAACTAATGGTTTTGTTTCTATGTATAATGTTCCGAACACCAAAGC  
AACATTTATTACACAAACAGATTCTTCACCACTTTACCTCAAGACTGGCGAAAAGATAGTGTACTTGGT  
GAATCAATCCTCACAATAATATCTTCTTCAATAGCTGAATCATCACTTGAATCACCTCTTCTATCTCTGC  
TTCTCCACT

>NF10547\_low\_6 signature: ATGAGATGGACATCATCA 5' end  
ATGAGATGGACATCATCAACACCTTCATCAAGTTGCTCCCCCTGCTCAATAACCTCACCAGGTTGCTCCC  
CCTGCTCGGAAACCTCGTCGGTCTGACTTTCTGCACCTGTGGGATTGTTAGAAGTAGAAGGAATAGTAAC  
AAAGTTAGGAATTATAACCATTCTTCGCCTTTCTGACATATCAGCAGCAGTTCTAACTTCACTTTCTCGG  
AAGACTACATCTCTACTTCTGATGACCTTCTTCTTTACAGGATCCCACAGTCTGTACCCGAACTCTTCAT  
CTCCATATCCGATAAATATGCAGGGAATAGATTTATCATCCAGCTTTGTTCTCTGCTCCTCCTCAAGAT

>NF10547\_low\_7 signature: TGATGATGTCCATCTCATT 3' end  
GATCTAGAGGAGAAGCATAGGACCCATGAGATGATATGAAAATATTAAGAGGTAGGAAGTGTGGAACATA  
CCTGAAATGGGAACACAACCTTGTCTATCATATTGTGACTTCTTTCATTGATATATATGAAAGGGATGTGAG  
CAATTTTGGACCAATGTTTCTTCTTTTATACCTTTCTACTAACAATGGACATCGCACAAATGGACAGTTG  
CTTAAGAGAGTCAAGGAGGCTGTCTTCTGGTAATGACTCAAGCTTTTTCATTTCCACAATTGAAGTAAT  
TTCAGCGAGGAAGGGAGTGTGATGATGTCCATCTCATT

>NF10547\_low\_8 signature: TGATGATGTCCATCTCATTGCGC 3' end  
GGCAGCAGATCCAGCAGCACGGAGGGGAAGGAGTTTGGCGGAAGTAAAAGAGGAGGGGAAGCAATCCAT  
CTGGCAATGGAATTTCCAATGTGACGCTGGGACCCTCAGGACCCAAGGAATTACCAGTACCTAAAGTAA  
TAGAAGCTGCAATAGCCTTTAAGAAAGGGTTGGAATTGGAATTGGAAAGAAGGTTGAGAAGAGAAAACAAG  
AAGACCTCCAAAAGCGGGAACAAGTATTACACTTTTCCATGTTTCTTGAATAGGAGCTTCTCTCAACCAT  
GAGGCACCTGATGATGTCCATCTCATTGCGC

>NF10547\_low\_9 signature: TGATGATGTCCATCTCATT 3' end  
AGTGGAGAAGCAGAGACTGTCCATCAAAAACCCTGAGACATGGCTGCCGAATAGTTGGCACCCCATTA  
TCCGAAGGTAGCAGAAACTGCTTGTATGTCTCTGTTGAAAGGTCAAGTGAACAATCGAAAATCGCTCAA  
TAGACTTGCAGTCAACCAATTAACAGTGCCATTCAAATGCACACCATCATTATAGTCATGGTATCGATA  
ATAATTATTGAACCAATTAACAGGAACAGTATTAAGCTCTGAATATTTCTCCAACCTATTATTACCTACG  
CTGTGATGATGTCCATCTCATT

## II. NF10547 FST sequences obtained by TAIL-PCR from R<sub>1</sub> generation

NF10547-F-1

CCAACAAATTAATTAATTTAAATTCTTCTTTGCAATTATGAAGAGAAAAAAATGTAAGCGTATACCATCT  
AGGGTTTTTTCAGTTTAAAGATCACGAGAGATGAACAAACCTGTTGTTGGAGTGCAAAAATATGGGCAACACAT  
CCATAAATTGGATCTTGAAGTCTAGCTTGAGCTTCATAAGAGATTGTGACTGCAGCTTCCACAACGATCGGT  
CACAGGGAGGTGTGCAAGAAGCTTTGAAACATTACTTGCACCAAAGACCTTATGAATAGCTGCAAAATGGG  
TAGCACCTTGTTTCATGGCAAAAGTAAGGTGCAAAAACACAACCTCTAACACATTTTCTCCTCAAGAATTTG  
CAGGCTCCACAAGGAGAACCAGAACCAGTCATCATGGCCGTAAGAATTTTTGGTTGTTTCTGGCTCTCTTG  
TGCTAATCATAATCATTATCACCATCTTTATAGACAAAAAAGAATTAACAAGAGGAAAGGGGAAGATTA  
TTAGAACGATGAATATTTTAATTACATAAGGTTCCCTTAATGGCCTACATGTTAATTATTTTATTTTCATAT  
AAAACCTATATCACCAATTTTTTATTTGTTAGAAAATGAGATTCTTATTTAAAAACATCCTTATGTGACAAA  
ATTAAGAGATAGCATTAACCAACCCATTTTGTGTTGATGATTGGATCTAGCTATTGGCTCTTGTCTTTTCT  
GTTTCTCAAGAATTATGTATATAGGGTACCTCATATATGATAGCGGGCAACGGTTTTCAATTACTACTTTT  
TTTATTTATTTCTTTATATAGATGACTTTGACCAAGAGAAAATTAATATGGGCAATGGAATTAATAAAGC  
AAAGTAGGTTAAATAATAATTGTATACCAAGGCACCTCTTAAAAAAATGGTAAACC

NF10547-F-2

GAAATTTAAAATTTCCGATTTTATTTTCCAGGAAATAATTTTGGCCACAATGCAGTGTTTTGGAAAATCAT  
CAGTCTAAAAAACACATCACAAAATTACAAAACAAAACATATTGTTCCCTATATATGGTTGTATCCACT  
TGTTTTATTTTGTGTAAGGGAAGACAATCACTGTTGTCCAAGTGAAGGACCGTAGAAAACATGACTTTGTGC  
AATTGCAATGCGTTTTTGTGGATCATTGAGATTTTTCATCCCAATGTGTTGACGGTTCCCTAAAAACCAAC  
ATATCTATCGTCATGACAATTTTTTTAAACATTTTTTAATTCAAAAAATATACATTTTCTATCGTCAATG  
TTACTTTTTCAAACAAAAAATAAATTTGGGTATCTAGTGGTCATTTGCATCATTCAATTCTAGACATGAA



ATTTCCATCAAAGGACTTCATTTTCAGAGAGATAATTGATATCCAGAAACACAAGGGAGATGGGTAGCAATG  
ACTCCTTCATCAAGGTGTTAAATATATCATCACCTTTACAATATTCAATCTTGAAAGTGCTGTCAAATAT  
TGGAGACCCCATTCGGTAACCGGCGGTGTTGTTTTTGGGTAGAAATGTCAATTGATTGTAATTTGGGAGG  
TAGACAAACTCCTTCAGAAAATGACAGCTTTTGACATTTTCATATGCAACTTTTCAAGAGCGCTGAGCATGT  
CCATCTTAAACTTGACTTCAAATAAATCAATTGAATCATGGGATGTGATAGTAAGTGATTTCGAGGCTCGAC  
GACCGAGGTGAAGACCTTTCTGAAATATAAATGGAATCCAGACTCCTACAATCACGTATGGTAAGTGTGG  
GAGCGCAGGGAAACCATCAAGTGTGAAGGATGTAAGTT

NF10547-F-7

CCCAACATCACGTTTCACTCACGTGTTTTATAAGAAGAATAGTAGTAATTGATTAATGTCAAATGTAACCGGG  
CTGGTTGTTAGCACTTAGCATGGCTTTGTTGGATTTGGAGCATTTCCTGAGAAGAAGATAACGCAAGTTG  
GAAAAGAACATCTTGGGAAACCAAACCTACTACCTGTTTGTCTTGGGACAGAGTAGTGTGGGAATGGATC  
TAAGCTTAGTACTAGTAGTAGCTGTGTATATCATATGCATGCAATTACACTTTTGGATAACATACCTAAA  
AACATGTCACGACAATGTTAATGTTGTGTTGTGTTGTGATGTGATTAATTAGTGGTACTTATATGGGAAT  
CGCGTTGGATTACGTTATTCAACAAAACCAATTTATTTTTGCATATATATAGTCATTTAGTAGGTGGTAT  
TGGAGCAACCCACATTTCTTTGCTATTTCTATATGCTATACTCTTTGATACTACTAGTAGTGAACAAAAA  
TGCTCTTCAAGTCATTATTGTAATGGTTGAGGGTGAGTTTTTCAGAATTCATATATGCTTTCTAGTGTCTAG  
TGGGTGTTATGAAAGCACTCTCTAACCATATTTAAGCATCATATTCTGTTGCAGTCCTCACCTATGATTCT  
TTCTTTTCTGACCAAAGCCCTGTTTGATCTAAGTAACACTACTTTGTGTTGTTTCTGTATATTTGTATG  
TAAATAACAAGGATTTTGTCTTTTTGTTAATTGGATTAAGATTCCCTTTGGTTTGGGAATTCATTTCTTAT  
TCTTCCCTTAGTTTTGGGG

NF10547-F-8

CCCAACACTACCATCAGCAGCTGCAGGAGGATCTTGATACTAAGCAATTACTGCTACATTTCAACAACAAC  
AATAATCAAATCCTACCTCCAAGACCAACTGTGGCCTGGAACAACAACAATTTCTTCATCATCAACACTCCT  
AGAAAGGGGTGCTTTTCAGAGTGAAGGCAACTTTTCGCGGATGAAAAAATCAGGTTTAGCTTGCAAGCAATGT  
GGGGATTTAGAGATTTGCAGCTTGAGATTGCAAGGCGATTTAACCTAACAGATATGAACAACCTGGTTCTA  
AAATATTTGGATGATGAAGGAGAATGGGTTGTGTTATCATGTGATGCTGATCTTGAAGAATGTAAAGACTT  
GCACACATCATCTCACACAGTACCATTAGACTCTCTCTTTTTCAAGCTTCCCCTCTCAATCTTCCAACA  
CTTTCCGCAACAGCAGCAGCAGCAGTCCATCCTCCTAGTACTGTTACAACCTTCTCATCTGAATGTGTTGTG  
TCTGTCTGTATATTGTATAGCATCCAAATTCCTAAGCAAAACATAACATCAATGTTAGCTCATATACCTTTA  
CTGCTTTTCAATTAATTACTCGTTAAGTTAGATTCTGCGGCTTTATTTTTGTTAATTACACATCATATGTTT  
AATTAGAGTTTTAGTTAACAAAGCATCATACCAAACATGTAGTCTTTCGTGATTACATAAACTATTTTTG

NF10547-F-9

CCCAACAGTCGAGAGTTCCAAGTTTGATTAGAGATCAGTGTCAATAAAGTTGGGGAAAAGGGGTCACGAGA  
AGCTTGGGTTTTGTTTTGGAAAATTTATTCAAAAGACTTGGCAATGAATCTTGCATGGTTCAAATGACAAC  
TTGGGGAGTTTCATTTGTTGGGGCAATAGTTGCACTCACTTCAAGTTGAACATAAATATATGATGATGTGTG  
TGTTTTGTGGAATAGTATACGACCTCATGTTTAAATTTGAATGTATTATTTTTATCTTGGATGTTGTTAGAAT  
TGTTTTTTCTTTCACCAGATGAATTTAATCAAAGAGGGGTGATTTAATGTCAATTTTTTACCCCAAACCA  
TCCCTCTTAATCGTTTTTTCATTACCTTTTTATTTAATAAGTGATTTTTTACATATATTTAGGTTTTTGTATT  
GTGATTTCTTCGTCTTACTGCAACGTTGTTTTGTTC

NF10547-F-10

CCCAACAAGATGGTTCTGCAAGAAGAAAACAAAAGCAATATAGAATTAACCTAAAACGAAAACAAGCAAA  
AAGAAGCATATATTGTTTCAGGGAAACGTACGTACGTATATAGCAACGAGTAATCGTCAGCAGTGAACCTGA  
GGAGTCTCATGAAAGCCTTCAAAGCCTTCTAGATTGTTCTTGAGTTTTCTTGATACCTTGCTGGATAAAACC  
CCATCCTTCTTCAAAGTTGATAATCTTTGACATGTTGGTGAATTGAGAGCTGCAATGAAATATTGATTA  
AGAATTTCAAAGAAGTGAAGAAAATAGAATTGAGAAGAATCGCATGAAAAGAAGTGAAGGGTGAACCTT  
GGAATCGCAGAGTGAAGAAAGTTTGTGTTGATGCAAAGCGAAGTTAACCTATAGCTATGCATGCCTTTTGT  
CGTTTTATA

NF10547-F-11

CCCAACAGACTTAAACAAGGTCCTTGGTGTGATAAAACGATCCTCGTTAAATGGGTTTTCCCTCAAGTCGTA  
TAGAACGTTTTCCGTGCTCATCCACACAGGTATAAGGCGTTTTCTCTGCCTAAACAAGCCTTCGCTTGCTGC  
TTTACTATGGATGCTGTCAAATACTTGCCTCTGGCTTTGATTGTCCATGTTTGCATGTTCCAATACTCTT  
AGGCGTGTGCAAGTTGCTTTTTGAAGGGTATTTAATTTTTTTTTAAAGAATAACATGATATTATATTCT

CATATATGTATCATATTGTTCTTTTAAATATTTTTGAAAAATATCAAATATATATTTAAAATATAGACTTAAACA  
CCCTCCAAAACCCTCTAAAACCCTACTCACAAACACACCCTTAGGCA

NF10547-F-12

CCCAACATCAATCTCAATTCTCAACATATTCCAGATATGTATTCTTCAAATAGTTCCCTCAATGGAAATAA  
CCTAGCATTTCCTCTAAATCACCTTTTTGTTCCCTTTGAAAGCAACTCAACTTCATCAAAAAGATATTGAAA  
ACAGTCATTCCCCCTTCTCTTCCCAGTCCTTTCTCTTTTCAATTCCCTAATTATCCTGATGATGAT  
ATTGATCCCTTTCAAGACAGCCATCAAATCTTCCCTCCAACAACATGATGTTGATTTCCAACTTCATCATCC  
ACCTGTTGTCTATGAATAACAACAGTACTGA

NF10547-F-13

CCCAACAATCTACTATTGAGAACCCTCGATATTGAGTTTCAATACTTCAAGAATAATAATAATGAAAGAG  
TATTGAGCTGAGTTCTAGAAATTTGGCAAAAATATTCAAATTTCAATTTGGATGTTAAAAATTATCTTGTA  
GAAAATAATCTAACATATGATTTATCAAACAATAACTAGAAACATGTCCGGTTTCAATGACCTGTATGTTT  
AAGTGATTTATTACTCAAAGAGGAGAGATGTTAAGAACAACACCTAAAGGTAGAAGTTCTGTTAATCTTC  
CATGATCCTTTTCTG

NF10547-F-14

CCCAACATCAATCTCAATTCTCAACATATTCCAGATATGTATTCTTCAAGTAATGCATAAACATTATATCA  
CATCATAATCAACAACAACATATCTTATACAGCTTCACAGATTATAATTAACCTCATTGTTAAGTCTTAAT  
CCTACCCAAAGGTTCAACTCTCGACAACCTCGT

NF10547-R-1

CATCATCAATCTAGACATGTGAACAATAATGATAATAACAGTAATATTCTTTCTAAATAATGTAAC TAGAA  
ATCAACTTTGTGTACCCATTACAGGAAAATTGCATTACATGATATCATTTAAACTATTAAAATCTCCACCA  
ATAATCTCTTCGAGTCATGGAAACGTAACCTCCAAAAACCATAAGTAATTATTCTATTTCGCATGGCAAAAT  
TGTGATATCATTTCCAATCCTAACCTATGTGATTTCCCTACTCGTATTCCATGTTTCATCGTATTCCATAA  
TCATCATTATTTATATATCTTTCTTATAATCCTCATGTTTATAATTATCAATGTTCTCATTATTTCCATAAG  
GCATTTTAAACATATAAAGTACGTAATCATGTTTATGAAAAGGAAATATATATCATTTTCTAACATATATC  
ATATAAAAAATGATTTTATGCATTTTCTACTATCACAAACACATGCAAAAAAGTAAAAACAACACAACAA  
ATAAAAAAATCAATATTTTGTTCATCTTGTGAGAAAACCTATAATGAAGACATATCTCTCAAACAAAAGA  
TACTAAGAAATCACAAGATAATCCTTGGATATTATTTATTTATTTCCATCCATAGTAGGGCTTCAGTGACCC  
TTCACATATTATTTGAAATAAAATTTACCTAACTATTCCATAACATGTATTGAATATTTTTCCCACTTGAGA  
ATAGTACATGAATGTGTTGGAACATTAGTGAGTTCTTGTGGAAAGTTGGAAAGAATAACACATAGAAAGAA  
CTAGTGTGGTATGACTTAAAAATGTCTCACATTGGAGAGGTACATACTACCTAGTAAGGTGTTTACATAG  
TGAGCGGTGACTCGAAGG

NF10547-R-2

CATCATCAAATTTTACATCCATAAAAAGCTTACAATTTGTTTAAATGGTTGCATTATCATTGTGTTTCATCTTA  
AAAATCTATTAAAATGCTTGAAAATCAAGTCTTTATGTCTTTCTAGCATTGGTGAATAACATGGATTTAT  
ATCAATATCACAATTCATTTGCTTACTAATCTATCAGTAATGGTTTGTATTATTTGTAGATTTTCATTTAT  
ATTGAACTTGCTACCAATTCAGGTTATTGATTTACGAGTATGTTAACAATTGGAATTTAGAGCAATGGCT  
TCACGGAGCAATGCGGCAGCATGGCTATCTTACTTGGGAAGCTTGGATGAAAATCTTCTGCGGCTGGGAA  
CAGCCAAAGCGTATGCTCGTTTTTAACTAGTTTCCAGAGTTTATTTTGTGAAATGAGTTTCCTTTTTTATC  
TATGATTAATTTGATTGATTATTGTATCTTGTAAAGTTGGCTTACTTGCACGAGGCGATTGAGCCAAAAGT  
TGTACATCGAGATATTAATTCGAGCAATATTCTAATTGATGATAGCTTTAATGCTAAAATTTCTGACTTTG  
GGCTTGCTAAGTTACTTGGTGCCGGTACTTTCCGGTAAAGCTTCATGTTCCACATTTAGAATTTGTTTCTT  
TTTTAAGATTTAGTTTCTTTAGAAATTTCTTATTTTATTAGACACGGTGACGTGCATTTTTTCCATATTGCA  
AATTAAGAAAGTATATAATTATTACAGTCTAGTCATAATTACAATATATCCATATTAAGTACTATATTTT  
TCCTTTAACAATCTGGAATATTTCTGCCAAAACCATTGCATTTA

NF10547-R-3

CATCATCATGAGGAATATGAGCTATCTTGTCCCAATCCTCCCCTGTTCCCTCTTTGCATCGTTCCCTCTAAT  
GTTGGGCAACCAATGATATTAAGAAGCTCAAGAGAAGTGAGGCGTTGAATACCCTCCGGCAAGCATCGCAA  
TCCTTCCAAATCCCAAATCGTTAGAATCCTAAGGGATTGAAGACCTTCCCTAATTTGCTCTGGTAAGGACT  
CCAATTATTACAATAATTGATACACAGATGCGTCAAAGCTGGATTAAAGGGTTTCATTTGGTAACTCCTTC  
AGTTCTCGGAAATCACGTACCACCAGATATTGAAGAGAAGTAAGGTTCTTGAACATCTCCTCTGGTAAGGA

TGTTATTCCTTCACCGCCAAATAGATAAAGCAGAGTAAGACCACGCAAGGTAGAGATTGACCTCAGTAACT  
CATTGTTACATTCTTTGACACTGAGGTCTTTAAGAGATGGAAGACATGGCAGTCCAAGTTTAGGGCATTTCG  
ATGATTAGCAACTTAGAAAGACAAGGAAACATCTCCCCTCTTTCCACTTTCAATAACCCCTCTATGTTTGG  
TAGGAATTCTAATACGAGTACCTCCAGAGATGGGAAAACCTCACCTCCATACCATCCTCAGATTTCATCAT  
CATCCAAGTATTTTCAGATTATCCATATCAGATAATTCAGTTTTTTTTTAGAGATGGTAGTTTTTCCAAGTAA  
CGGAAGCCGCACAATTTTGTGCAATCCTCAAGTTTAAAGAGAAATTAATTACTAAGAAGGCTTATCCACA  
TGGTAAAGATAATCCGGTGATAGCACTTTAT

NF10547-R-4

CATCATCAATATACATCCTTCTTAATTCCATTTTTTCATTCATTTTCTTTCATCAAGCAATTAACAGTTTTTC  
TTTGGAGATCTTCTTTCACATCTCTTTCTATTTGCCATGATAATCTCCTTGACGGGATGCTAGGATCACATA  
TCCTCTGCTTGGTAATTGCTCCTTGTGGCCTCCTAAATAAAGGGATAAACGAAATTTCTAATTTCCAAGGTT  
GGTCAATAATCTGTTAAGAAAGGATTGTTGAGCAAAAAGCCGATCTTTATGGTTGTTTTCAAAAAAAAAAAT  
TTCTTTCAAAAAACATGTTAAAAAATATAATTGATCTCGGAAGCCTCGATTAATTTCTCTATATTGTTGG  
ACGCAAAAGTTTTTGTGTGTAGGTCCCATAAAAAACAACCTTTCTTTCTTCTGTGACAGTTCCAAACAGA  
GGAATCACACTTTTCAAGAAACTTTTCATCCTTCTTACTATCTTTTCACTTTCTTTCTTTTGTATAAGTTA  
ACATGAACCTTTAATTAATTGTAGTAACCTTATTTCATAATTTTTCAAAAATATCCTATAAATTATCGTAAAA  
TATTTTGTTTAAATCATGATAGAGAAAACATGTTGTTGACGGCATTGTAAGAAAATGGCGCCACTGAACTC  
TCTTTGAAAGAGTATCCACTCATCGACTCTAACTTCCAAACTTTCTGCGCTTCCCACGCCATTTATTCTG  
GTCGTTCTCTCTTCTCCTCATTTTTCCCCTTTTTTCATCTTTCAATTTTCATCTAACACCATCATTATTCATTTT

NF10547-R-5

CATCATCAGTTCATTCTATTCTTTCATAAGATGATGAGATACTTTGGTCCGCAAACCTAGACTATCTTCTACT  
TTAATGTTGAGATGTTGTTGAACATTTTACTAGTAGGTATTATTTAAAGAGTAGAGAACAACAAAATTTAA  
TATTTTAAACTTTTAAATTAATAGTATAATCGAAAGAGAAAAAAATTTACACAAAACCTAGCTATCAAATCT  
AGATTTCTCATTGGAAGAAGTAGTTGATGGATTTTTCTTTTCTAGTTCTATTCTTTTTTTAAATTAGTAAC  
AAATGGAAGAAAATTTTCAAGAAGTATTATTTGTTTAAAAAAAACATAATCAACAACATGTATGTTTTG  
TATTATGGTGACAATAATTGATTTTTGATTGAATTTTTTATGTAAAATTGATGGTGACAACCTAGGGTATTCA  
TGGAAGAATGATGGGTAATTTACCCCAACCAATACATATTAGCCACATAAGCACATTTTTAAGTGGTATCC  
ATGAACTATCTTAACCCACCAACAAAATTGCTCATTTTTATTGGTTGGTGGGTAATTTACCCACCATTCTT  
CAATGGTGATCTAGAAAAACACAAAATGGATTTCTATAAGAGGAACACTATATAGTACGGAAAATCTACAG  
TACGGAGTGACACGATGCATGCGGATGGTGTGTTATATTTTTTAAACAAAATAAAGTTGAAATGTTTTACG  
ATCTAAAATTAT

NF10547-R-6

CATCATCAGTATATGGTAAAAAAAACCTCTTTTTGGCACACGTAACCTTTAACTTTTGTCCAAAACTGTGA  
AAAAATGCAGGCCATTGCTATATATAGCGAAGAAATATCCAACGATTTTTGTCCCGAACTGAGAAAAGCTGT  
TAAAAAGCACCCCACTAATAACCATACATGAGGGTGGTGTATTAGTAAACTAATTACTTATTGTACATAG  
GAACAGCATTTTTCCGTGAAAAAAATTGAAAACACAATTTAGAGCCTAAAACCTAAAGTTGATAGTATATTTA  
GAAGGATTA AAAACATATTTAACTTATAAATAAATAAATAAAGTATTGACCTGGCTCATCTAAATGCCAT  
TAAATGCGTAAATATGCTTGCTCCATCTTCTTACATTCCAAAATCTGCATCTAACTCAAATCACAAAGTA  
ATTAGAAAATGAAGAATCACTCCTTAGAGTTGTTTCTTCTTCTAACTCTCTTCTTCCATGCAAATGCAGGA  
GACTCCAATGTAAGTATTTAATTACACTCTTCACTTCATTTAATTACACTAACCTCATTAAATTTCCATT  
TGATCTTGTAACCTCAATGATCAGCATATTCATGTAGTAATAATCATTATCATTGTTTGGATTAAACAAT  
ACTCACATTATTACATCCAAAAAACCTCACTCCATTTTGATAGGAGCCAGATCCAATACGACCTTATTGAA

NF10547-R-7

CATCATCAAAAAGAACAAGGGTTATGATGAATAGCATGAACACCAACATCAACATCAACGTTTCTTCTCAT  
TCTCATGATGTTATTGTTCCATCATCACTCATGTCTCCTCTTTCAGAATCAATCACTTTTTTAACCCCTATT  
AAATGGATTTCTTTTTGGAGCAGCGATGAGATTATCAACAACAATGATCATCATCAATTGTCTCTTG  
ATCTTTCTGGTACGACCCTTTTGGATAACAACAATGAGCAACAAAACAAGAGAAGCTAGTAATGAGATGATG  
ATGATGTTGTTAATGGTTGTTGTTTCTTAATTTTTTTCTGGATTTTTTTTATAAATATTCATGAAGATGATG  
AAAAAAGTGAAGGAAGAAGATGAAGAAAGCAAAAAAAAAAAAAAAAAAAAAAGTCATTTAACAGCCAAAAC  
AAACGGAGGGGGTAATTGACTAACGTTTGTCAATTTTCAAGGGTTTTTTTTGAAGTTTCTTAAAAATCAGGG  
GGATTTTTGACGAAAGCTACAATTTTCAAGGGAGGTTTTTGTCTTATTTACTCCATAAATTTCTAAGCCTAGGA  
CTGTTTTAAACGTAAGTATTATTTCAACAATTATTATTGAAATAATTTACGGAGGAACAACCTAAAGATAT



ATAAAAAAAAATTAAAAATTGATATGAAAACTA

NF10547-R-8

CATCATCACATCCAATCATATTCATTCACCTTAGTTATATTAGTTCCTAAAAATATCTATGTGGTGAAATATG  
ATTGGATACATGTATAAAAAAATTACACTGACAGTGTATACCAATTAAGTCTATTCTATTTTCATGTGAT  
GTAAACATTTTATACTTTTGTGTAGACTTTTAAAAATTCCTTCAAATGGATTGTCTGCTGGAGCAATTGCTGGA  
ATTGTGATCGGATCATTGGCATTGTGCATGCTGATACTCTTTGTCTTTGGAAAGATGGGTACCTTTGTGG  
AAAAGATCTAACAGACAAAGGTAAGATTGAAGTCTAAATAATCATAACAGTTACTGCCCTTATGATTTGA  
TAATTTTACAATAACGATCCAAAAATTGGATAATTTTAAACGGTCAAATATGCTTTTCGTCCCTACAAAGGT  
TGACTTGGTTTGTATTATATAATTACATTTGCTATTATATCTTTCTTTTATGGTCACCTCTTGTCTGTA  
GTAAAATACCTATCTTATTGCAGAGCTCTTAGAATTA AAAACAGGCTATTACAGTTTGGAGACAAATTAAG  
TTGCTACTAATAACTTTGATCCACAAAAAAGATAGGTGAAGGAGGATTTGGTCCAGTTTACAAGGTAAT  
ATGGATAAAGTAGTTGTAATTTTACTTCA

NF10547-R-9

CATCATCAGATGTAGCTGAATATTTGATGAACTGCTTCTGCTATGTCATTTGCTGTGCCTAGCTTACAATC  
TTCTTCAATCTGTATCACCCATATATACAGCTCATTATTGATTTATTTATCAAATAATAATAAATAGAACT  
AATAAAAAACCAGAAAATTTGTCAAAAAAAAAAAAACTTAAAATGTGTTCAATGTAGCATGTATTCCAATC  
TGAAAACAAGCTGATGATGTGGTCTGCTTAGGTAATTTATGGACCACCTCATTGCTTGTGTCCCTACAAA  
CTCAACACTAAAGTTGACATAATATTGTTCAAAAATAATTTTATAATTATGAATAATCATCCCAAAATCTA  
TAATATCCTGATGTGCAGGTAATAAATAATTCAAAAATTTAAATGATCCGACTAAATTATTTTAGTTAAA  
TTTTTTTTATTTATGTGTATGGCCGAATACGTGTTGTGACCAATAAACTTGCAACAATAATCATAGTTCC  
TCTTTCAAATAGTGTGTTCTTTTTTTTTTTGGTCAATATCAAATAGTGTGTTCTAAAAACAACATTAGAGA  
AATAAAAAATTATTATCAATTAAGTAACATTA AAAACTAGTTAATATTAATTAGTTTATATGAAAATTTG  
AACTCT

NF10547-R-10

CATCATCACGACGGACTATGGGCCAGCCCTGCTTCTGCTGTTGCACGAACTGTGCATGTTTATTGGCGGAGA  
AAGCATTGTGCGAGTCCATTCATATTTTTCTAAGGAATGTTTATATTGAGAATTATAAGAAAAAAGTTAA  
TTTCATGATAATTAAGAAAGTTAGTTTCTTCAAAAAAAAAAAAAAAAAAGTTAGTTAAGTGAATTAATTTT  
TTAAATTTTGTGTA AAAATATACTTTTCAGTCGCTTTTAGGCCACACACCTTGCTATTAATTTACTGAACTAC  
CTACCTTTGTTAATATACGATAACAAAGTTCACTAATATCCTTATGTATATCTAAGTTGGTAAAGATATTG  
CTTTTTATAAGTATGAATCGAGATTTAAATTTCTAAATTCGTCACCTTATTCATCTTAAAGATGAAATTTCAAC  
CACTATGTTACTTTGAGAAAAATATAAAAGCACTCAACTATTTCTATGCTAAAAACATCATCTTTAAATAG  
TTTTGATGCAGTTAACTTTTTACACCAATTAATATTTTAAATCACATTTGATTGGTGTTTTTTTGACCGC  
GTAAAACTGTTAAGTGAATAGTAGTTATACTAGCATTTTTCGTATTAAGCTTTCCCCACCTTATTTTTTCC  
AT

NF10547-R-11

CATCATCAAACCGTTCTCATCATGCTCGTCTAAAGTCTAAAAGTGGTGAAGGAGTGTCTGCGTTTTTGTTA  
ATGGTTGGCATAATGGTTGTCAATTTATGTTGTATGTGCTTGTACAGAAAACAATGATACTCCAGTTACTGT  
ACTCTAGCCTCAGGTTTGTAAACAAAACATCTATTCTTGTCTGTGCAATGACAGTGTGACTGTAATATC  
TCTAAGACATTGTAATGTTTTTGTGTCTGTTGTTAAGGTTGGAATGTTGGATGAGATGGGATGCACATT  
ACAAACGGATCTAGCTAGGATTGCATAAGCTGCTAATACATCCTCCAAGGAAGGTGTGCGCTGTTTATTGA  
AAGGTGAGTGAATGCTTTTGTATTCTAATATTTTGTAGGTTAATTTATATACATCTTTAGTGTACAAAAT  
TTTTACACATGCATCCAATAATGCTTTGCCAAATCAGTTGATGAGGTATGTCAAATGTGTTTTTAACTCAT  
TAAATAATGTGACAACATGCCATTGAAACGATTCAAAAACAAAATGACTTTGTTTGGGACTTTTTGAAAC  
TTAAAACACTTTTGGGAAAAACGTAAACTTAA

NF10547-R-12

CATCATCAGGTGCTTCAATGGTCATTAATTGGTGAATATTGTTTTTCTTCTTCTTTCATGATGTTAGCTA  
CAAAAATAGTACAGTGGTCAAAAATAGAAAACAAAATTTGATTATCCAGCTTGCAACGACGCTCGTACGGTAC  
TATTAATTTACTCCAAAATCTGCATGAATATATTCTTAAATCAAAGATCACAATGTATCTCTTAAAGATTAG  
TGTATAACAATCAACTAGTTGAGGTTTGTTTAACTTTAAAGTAGACGTTAACATTAACCAAGCATATCA  
AATGAACAATTAGTGTGGGAGTTAGTTTGAATAAACTTCTCTCTAAACACTTAAAGAAAAATTTGTATACC  
ATTTTCTTATTACTTTGATTA AAAATAAAAAATAAAAATAAACTAATGATAAAAACAGTAATAGAATTGTGGATA  
TACCGATCCCCACAATGCAGGTGCAAAATAGTTCTTCAAATGATTTGTGCTTAAATATTTTTTAGATGTTT

CATAATGTTTG

NF10547-R-13

CATCATCAATCTGAATCACCAACCTTCCTAACTTTATACGAACCATTCAAATTTGGATTTGAAGAGGTTTC  
TTTCTACACCAAAAACAACAAATTCATCCCAGACAATAGCTGAAACTCATGAGGAAAAGTCTCATGATTGT  
TTCCCTAAATTTTTCAAACAATTATTACATTTTTTTTTTTGAATAAAAACAACCAACAATTATTACATATAATG  
TCTTTAATTTATATACAGAAAAAATGATACAACAAGAAAATAACGTTAATATAATAAGAACAATGATATG  
AGAACAACATATAATTTATGCTAAAATAAATAATCACCTTTTCTTAAATTCTACAGCTTGATGAATACAA  
GGATTTACATAAATTCTGGTGA

NF10547-R-14

CATCATCAAGACTCTCTTGTGAATTGCAGTGGTAGCAATA
