# Supplementary material for: Rapid identification of causative insertions underlying Medicago truncatula Tnt1 mutants defective in symbiotic nitrogen fixation from a forward genetic screen by whole genome sequencing
Source: PubMed Central journal article supplement (PMC4769575; doi:10.1186/s12864-016-2452-5), 2016-02-27
Supplement: 12864_2016_2452_MOESM11_ESM.pdf [file 12864_2016_2452_MOESM11_ESM.pdf]

**Additional File 11: Figure S1**

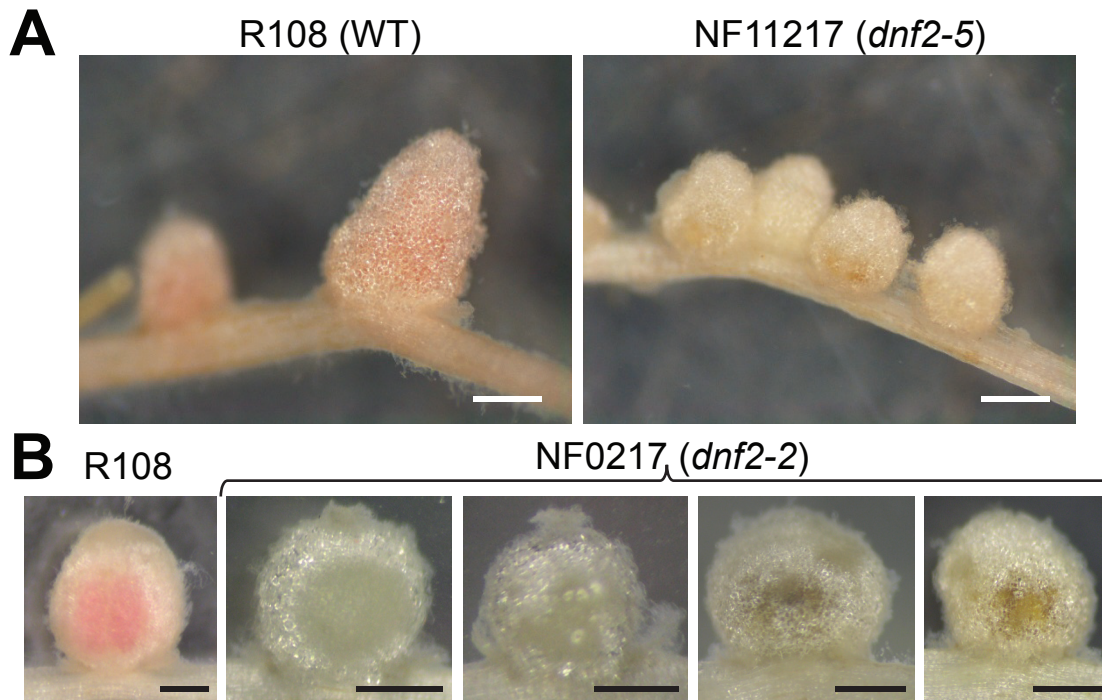

**Additional File 11: Figure S1: Comparison between nodule phenotypes of NF11217 (*dnf2-5*), NF0217 (*dnf2-2*) and R108 (WT).** NF11217, NF0217 and R108 were grown in aeroponic chambers and inoculated with *S. meliloti*. At 15 days post-inoculation, nodules were photographed. (A) NF11217 and R108 were grown side-by-side, inoculated and imaged. (B) R108 and NF0217 were studied in a separate experiment by Drs. C.I. Pislariu and R. Dickstein. Images in (B) are courtesy of Dr. C.I. Pislariu, current address: Department of Biology & Chemistry, Texas A&M International University, Laredo, TX 78041. Scale bar=0.5 mm.
