# Supplementary material for: Rapid identification of causative insertions underlying Medicago truncatula Tnt1 mutants defective in symbiotic nitrogen fixation from a forward genetic screen by whole genome sequencing
Source: PubMed Central journal article supplement (PMC4769575; doi:10.1186/s12864-016-2452-5), 2016-02-27
Supplement: 12864_2016_2452_MOESM12_ESM.pdf [file 12864_2016_2452_MOESM12_ESM.pdf]

**Additional File 12: Table S9. Co-segregation analysis of NF11217 Nod+Fix- phenotype with *Tnt1* insertion in *PLC-like* gene.**

(Veerappan et al. 2015, submitted to BMC Genomics)

| <b>Plant line</b> | <b>Phenotype</b> | <b><i>PLC</i></b> |
|-------------------|------------------|-------------------|
| 1                 | Mutant           | Defective         |
| 2                 | Mutant           | Defective         |
| 3                 | Mutant           | Defective         |
| 4                 | Mutant           | Defective         |
| 5                 | Mutant           | Defective         |
| 6                 | Mutant           | Defective         |
| 7                 | Mutant           | Defective         |
| 8                 | Mutant           | Defective         |
| 9                 | Mutant           | Defective         |
| 10                | Mutant           | Defective         |
| 11                | Mutant           | Defective         |
| 12                | Mutant           | Defective         |
| 13                | Mutant           | Defective         |
| 14                | Mutant           | Defective         |
| 15                | Mutant           | Defective         |
| 16                | Mutant           | Defective         |
| 17                | Mutant           | Defective         |
| 19                | Mutant           | Defective         |
| 20                | Mutant           | Defective         |
| 21                | Mutant           | Defective         |
| 22                | Mutant           | Defective         |
| 23                | Mutant           | Defective         |
| 24                | Mutant           | Defective         |
| 25                | Mutant           | Defective         |
| 26                | Mutant           | Defective         |
| 27                | Mutant           | Defective         |
| 28                | Mutant           | Defective         |
| 29                | Mutant           | Defective         |
| 30                | Mutant           | Defective         |
| 31                | Mutant           | Defective         |
| 32                | Mutant           | Defective         |
| 33                | Mutant           | Defective         |
| 34                | Mutant           | Defective         |
| 35                | Mutant           | Defective         |
| 36                | Mutant           | Defective         |
| 37                | Mutant           | Defective         |

|    |        |           |
|----|--------|-----------|
| 38 | Mutant | Defective |
| 39 | Mutant | Defective |
| 40 | Mutant | Defective |
| 41 | Mutant | Defective |
| 42 | Mutant | Defective |
| 43 | Mutant | Defective |
| 44 | Mutant | Defective |
| 45 | Mutant | Defective |
| 46 | Mutant | Defective |
| 47 | Mutant | Defective |
| 48 | Mutant | Defective |
| 49 | Mutant | Defective |
| 50 | Mutant | Defective |
| 51 | Mutant | Defective |
| 52 | Mutant | Defective |
| 53 | Mutant | Defective |
| 54 | Mutant | Defective |
| 55 | Mutant | Defective |
| 56 | Mutant | Defective |
| 60 | WT-L   | Het       |
| 61 | WT-L   | WT        |
| 62 | WT-L   | Het       |
| 63 | WT-L   | Het       |
| 64 | WT-L   | Het       |
| 65 | WT-L   | Het       |
| 66 | WT-L   | Het       |
| 67 | WT-L   | Het       |
| 68 | WT-L   | Het       |
| 69 | WT-L   | Het       |
| 70 | WT-L   | WT        |
| 71 | WT-L   | WT        |
| 72 | WT-L   | Het       |
| 73 | WT-L   | Het       |
| 74 | WT-L   | Het       |
| 75 | WT-L   | Het       |
| 76 | WT-L   | Het       |
| 77 | WT-L   | Het       |
| 78 | WT-L   | WT        |
| 79 | WT-L   | Het       |
| 80 | WT-L   | Het       |
| 81 | WT-L   | Het       |

|    |      |     |
|----|------|-----|
| 82 | WT-L | WT  |
| 83 | WT-L | Het |
| 84 | WT-L | Het |
| 85 | WT-L | Het |

To test for the co-segregation of Nod+Fix- phenotype in NF11217 *Tnt1* insertion line, wild-type like (WT-L) or Nod+Fix- (mutant) plants from BC<sub>1</sub>F<sub>2</sub> population obtained from NF11217 X R108 crosses were genotyped using either *PLC* (Medtr4g085800) gene specific primers Medtr4g085800-1F and Medtr4g085800-1R (WT locus) or *PLC* gene specific primer Medtr4g085800-1F with *Tnt1* specific primer *Tnt1-F1* (mutant locus). Genotyping primers are listed in Additional file 15: Table S11.
