# Supplementary material for: Rapid identification of causative insertions underlying Medicago truncatula Tnt1 mutants defective in symbiotic nitrogen fixation from a forward genetic screen by whole genome sequencing
Source: PubMed Central journal article supplement (PMC4769575; doi:10.1186/s12864-016-2452-5), 2016-02-27
Supplement: 12864_2016_2452_MOESM13_ESM.pdf [file 12864_2016_2452_MOESM13_ESM.pdf]

**Additional file 13: Table S10. Co-segregation analysis of NF10547 Nod+Fix- phenotype with *Tnt1* insertion in *NIN* gene.**

(Veerappan et al. 2015, submitted to BMC Genomics)

| <b>Plant line</b> | <b>Phenotype</b> | <b><i>NIN</i></b> |
|-------------------|------------------|-------------------|
| 1                 | Mutant           | Defective         |
| 2                 | Mutant           | Defective         |
| 3                 | Mutant           | Defective         |
| 4                 | Mutant           | Defective         |
| 5                 | Mutant           | Defective         |
| 6                 | Mutant           | Defective         |
| 7                 | Mutant           | Defective         |
| 8                 | Mutant           | Defective         |
| 9                 | Mutant           | Defective         |
| 10                | Mutant           | Defective         |
| 11                | Mutant           | Defective         |
| 12                | Mutant           | Defective         |
| 13                | Mutant           | Defective         |
| 14                | Mutant           | Defective         |
| 15                | Mutant           | Defective         |
| 16                | Mutant           | Defective         |
| 17                | Mutant           | Defective         |
| 19                | Mutant           | Defective         |
| 20                | Mutant           | Defective         |
| 21                | Mutant           | Defective         |
| 22                | Mutant           | Defective         |
| 23                | Mutant           | Defective         |
| 24                | Mutant           | Defective         |
| 25                | Mutant           | Defective         |
| 26                | Mutant           | Defective         |
| 27                | Mutant           | Defective         |
| 28                | Mutant           | Defective         |
| 29                | Mutant           | Defective         |
| 30                | Mutant           | Defective         |
| 31                | Mutant           | Defective         |
| 32                | Mutant           | Defective         |
| 33                | Mutant           | Defective         |
| 34                | Mutant           | Defective         |
| 35                | Mutant           | Defective         |
| 36                | Mutant           | Defective         |
| 37                | Mutant           | Defective         |

|    |        |           |
|----|--------|-----------|
| 38 | Mutant | Defective |
| 39 | Mutant | Defective |
| 40 | Mutant | Defective |
| 41 | WT-L   | Het       |
| 42 | WT-L   | Het       |
| 43 | WT-L   | Het       |
| 44 | WT-L   | WT        |
| 45 | WT-L   | Het       |
| 46 | WT-L   | WT        |
| 47 | WT-L   | Het       |
| 48 | WT-L   | Het       |
| 49 | WT-L   | WT        |
| 50 | WT-L   | WT        |
| 51 | WT-L   | Het       |
| 52 | WT-L   | Het       |
| 53 | WT-L   | Het       |
| 54 | WT-L   | Het       |
| 55 | WT-L   | Het       |
| 56 | WT-L   | Het       |
| 57 | WT-L   | WT        |
| 58 | WT-L   | Het       |
| 59 | WT-L   | WT        |
| 60 | WT-L   | Het       |
| 61 | WT-L   | WT        |
| 62 | WT-L   | WT        |
| 63 | WT-L   | WT        |
| 64 | WT-L   | Het       |
| 65 | WT-L   | WT        |
| 66 | WT-L   | Het       |
| 67 | WT-L   | WT        |
| 68 | WT-L   | WT        |
| 69 | WT-L   | Het       |
| 70 | WT-L   | WT        |
| 71 | WT-L   | Het       |
| 72 | WT-L   | Het       |
| 73 | WT-L   | Het       |
| 74 | WT-L   | Het       |
| 75 | WT-L   | Het       |
| 76 | WT-L   | Het       |
| 77 | WT-L   | Het       |
| 78 | WT-L   | Het       |

|    |      |    |
|----|------|----|
| 79 | WT-L | WT |
| 80 | WT-L | WT |

Co-segregation analysis was performed using Nod+Fix- mutant plants (purple leaves and white nodules) and wild-type like (WT-L) plants (green leaves and pink nodules) obtained from R108 X NF10547 BC<sub>1</sub>F<sub>2</sub> population. *NIN* (Medtr5g099060) gene specific primers Medtr5g099060-1F and Medtr5g099060-1R were used to genotype the wild-type locus whereas Medtr5g099060-1F and *Tnt1*-R1 primers were used to genotype the *Tnt1* insertion in *NIN*. Genotyping primers can be found in Additional file 15: Table S11.
