# Supplementary material for: Rapid identification of causative insertions underlying Medicago truncatula Tnt1 mutants defective in symbiotic nitrogen fixation from a forward genetic screen by whole genome sequencing
Source: PubMed Central journal article supplement (PMC4769575; doi:10.1186/s12864-016-2452-5), 2016-02-27
Supplement: 12864_2016_2452_MOESM14_ESM.pdf [file 12864_2016_2452_MOESM14_ESM.pdf]

|          |                                                                                                                                                                                                                                                    |     |
|----------|----------------------------------------------------------------------------------------------------------------------------------------------------------------------------------------------------------------------------------------------------|-----|
| LjNIN    | MEYGSLLVQQQQQCNSAYGSSLSNLSSDCGSVTTEADHIIIEELLVQGCWVEVSGVGVR-----EG-----ELQLQODESSF                                                                                                                                                                 | 74  |
| MtNIN    | MEYGGGLVADGG-----VFGPMV---G-----GGGGDQADIIEELLGEGCWIEASENSLMAMQOTTPQSQYMSNNNNIPMGMGEGRHFNHHHHHHHPHPHHMQECTAPAAHHDDQQESGF                                                                                                                           | 106 |
| Mtnin-16 | MEYGGGLVADGG-----VFGPMV---G-----GGGGDQADIIEELLGEGCWIEASENSLMAMQOTTPQSQYMSNNNNIPMGMGEGRHFNHHHHHHHPHPHHMQECTAPAAHHDDQQESGF<br>****. ** : .:* : . : ***** :***:*. * . : * * : * : * : * * *                                                           | 106 |
| LjNIN    | VVGKRWWIGPAAAVAGSCNSSVVKERLVIIVAGYLKDYTRNS--NVLIQIIVPLRRGILHDHDYHTNYLLSNPPQPEAAADHEVSVSLGFMPAAPSNSNLYSNVHVFRFRSHEYPRVQAQ-                                                                                                                          | 191 |
| MtNIN    | VVGKRWWIGPRANPG--PPTSVMKERVAVAGYLKEYTKNSNNVLIQIIVPMRRRSALIHQN-HYLQOES-----SSAPV-----SVNPNMNVHVFRFRSHDYPRHQOQQ                                                                                                                                      | 204 |
| Mtnin-16 | VVGKRWWIGPRANPG--PPTSVMKERVAVAGYLKEYTKNSNNVLIQIIVPMRRRSALIHQN-HYLQOES-----SSAPV-----SVNPNMNVHVFRFRSHDYPRHQOQQ<br>***** * . : *****:*****:***:*. * *****:*. * * * * * : * * * * * : * * * * * : * * * * * : * * * * * : * * * * * : * * * * *       | 204 |
| LjNIN    | QYGS-LALPVFERGTGCLGVLEIVITNQTTINYNVSN---ALDQAVDFRSSQ-SFIPPAIKVYDELYQAAVNEIEVMVTSVCKTHNPLALTWAPCIQOGK-----CGCGVSSE                                                                                                                                  | 296 |
| MtNIN    | QYGSLLALPVFERGSCTCLGVIEFVISNQTILINRYPQLDHLNSALEAVDFRSSHNMNIPQAVKVFEELYEAAVNEIMEVLASVCKTHNPLALTWAPCLQQQGGGKSSGASGCGVS---                                                                                                                            | 322 |
| Mtnin-16 | QYGSLLALPVFERGSCTCLGVIEFVISNQTILINRYPQLDHLNSALEAVDFRSSHNMNIPQAVKVFEELYEAAVNEIMEVLASVCKTHNPLALTWAPCLQQQGGGKSSGASGCGVS---                                                                                                                            | 322 |
|          | **** *****:*****:***:*. * * * . : *****: * * * * * : * * * * * : * * * * * : * * * * * : * * * * * : * * * * * : * * * * *                                                                                                                         |     |
| LjNIN    | NYMWCVSTVDSACFVGDLDILGFQACSEYHLFRQGQIVGTAFTTSKPCFAIDITAFSKAEYPLAHHANMFLGHAAVAIPRLRSVYTGSAADFVLEFFLPKDCDHDSEEQQLLSLSMVVQ                                                                                                                            | 416 |
| MtNIN    | TMSCCISTVDSACYVGDMDVLGFQACSEYHLFNGQGIVGTAFTTTKPCFAIDITAFSKSEYPLAHHANMFLGHAAVAIPRLRSVYTGSAADFVLEFFLPKDCRDTEQQKQMLNSLSLVVQ                                                                                                                           | 442 |
| Mtnin-16 | TMSCCISTVDSACYVGDMDVLGFQACSEYHLFNGQGIVGTAFTTTKPCFAIDITAFSKSEYPLAHHANMFLGHAAVAIPRLRSVYTGSAADFVLEFFLPKDCRDTEQQKQMLNSLSLVVQ<br>. * : *****:***:*. * * * * * : * * * * * : * * * * * : * * * * * : * * * * * : * * * * * : * * * * *                   | 442 |
| LjNIN    | QACRSLLHVVLVEDEYTL-PMPSHTSKEEEEEITITNHE--Q-----KLFVSPSSHESECSKESSWIAHMMEAQKKGKGVSVSLEYLQEPKKEFKVTT-NWDSSTDHDQQAQVFS                                                                                                                                | 524 |
| MtNIN    | QACRSLLHVVMDDNNNNMNDNNSADHDHDQFTFPPTTNSYMPSSASEPLSQVDVAVSGCSTKDTSSSCSWIAHMMEAQKKGKGVSVSLEYLQEPKKEFKVTTNWDREREDNV-----F                                                                                                                             | 557 |
| Mtnin-16 | QACRSLLHVVMDDNNNNMNDNNSADHDHDQFTFPPTTNSYMPSSASEPLSQVDVAVSGCSTKDTSSSCSWIAHMMEAQKKGKGVSVSLEYLQEPKKEFKVTTNWDREREDNV-----F<br>*****: * * * : . * * * . : : * : * . . . : * : * * . . . : * : * * * * * : * * * * * : * * * * * : * * * * * : * * * * * | 557 |
| LjNIN    | SDFGQMS-----GFK--ASTVEGGDQESSYTFGSRSSSGGRKSGEKRRTKAECTISLQVLRQYFAGSLKDAASIGVCPPTLLKRICRQHGITRWPSSRKIKKVGHSLKKLQLVIDS                                                                                                                               | 634 |
| MtNIN    | SEFGQVLQQQHQDQSSNSRASVSVVEAGEESPGACGRRSSSSSSGRKSGDKRRRTKAECTISLQVLRQYFAGSLKDAASIGVCPPTLLKRICRQHGITRWPSSRKIKKVGHSLKKLQLVIDS                                                                                                                         | 677 |
| Mtnin-16 | SEFGQVLQQQHQDQSSNSRASVSVVEAGEESPGACGRRSSSSSSGRKSGDKRRRTKAECTISLQVLRQYFAGSLKDAASIGVCPPTLLKRICRQHGITRWPSSRKIKKVGHSLKKLQLVIDS<br>*:***: . : * * * : * : * * * : * * * * * : * * * * * : * * * * * : * * * * * : * * * * * : * * * * * : * * * * *     | 677 |
| LjNIN    | VQGAEGAIQIGSFYASFPELSSSDFASCRSDSSSKMHNYPDQNNLYGHGDHGGVVTSLKSPSACSQTFAGNQPC---TIINNGDVLMTESPPVPEALLS-RRDHCEEAEELNNASI                                                                                                                               | 749 |
| MtNIN    | VQGAEGAIQIGSFYASFPELNSATANGGDG-----NDNSNNSFYNNHGDGIVTSLKSPSACSQTHAGNKLPMTTITAINHHHVMTENPTGAPLGVDFHAFMHASNINIQDYHQ                                                                                                                                  | 788 |
| Mtnin-16 | VQGAEGAIQIGSFYASFPELNSATANGGDG-----NDNSNNSFYNNHGDGIVTSLKSPSACSQTHAGNKLPMTTITAINHHHVMTENPTGAPLGVDFHAFMHASNINIQDYLLM                                                                                                                                 | 788 |
|          | *****:*****:***:*. * * * : * * * * * : * * * * * : * * * * * : * * * * * : * * * * * : * * * * * : * * * * *                                                                                                                                       |     |
| LjNIN    | QEDT--KRF---SRPKSQTLPPL-----SDSSGWSLETGAFRVKATFADEKIRFSLQPIWGFSDLQLEIARRFNLDVNTNILLKYLDDDGEWVVLACDGDLEECKDIHRSSQSRTIR                                                                                                                              | 857 |
| MtNIN    | QEDLTKQLLHFNNNQILPRPTVAWNNNSSSSTLLERGAFAFRVKATFADEKIRFSLQAMWGFRLQLEIARRFNLDVNTNILLKYLDEDEGEWVVLSCDADLEECKDLHTSSHTRTIR                                                                                                                              | 908 |
| Mtnin-16 | <b>SISLKKY</b> -----<br>*** *: : . : * * * * * . : * * . * * *****:*****:***:*. * * * : * * * * * : * * * * * : * * * * * : * * * * *                                                                                                              | 795 |
| LjNIN    | LSLFQASPLNLANTRFRNSSPS----                                                                                                                                                                                                                         | 878 |
| MtNIN    | LSLFQASPLNLPNTRFRNSSSSPS                                                                                                                                                                                                                           | 933 |
| Mtnin-16 | -----<br>***** ***** *                                                                                                                                                                                                                             | 795 |

**Additional File 14: Figure S2: Comparison of *Mtnin-16*'s encoded sequence with that of *Lotus japonicus NIN* and *M. truncatula NIN*.** The LjNIN sequence is Genbank accession CAB61243, the MtNIN sequence is Genbank accession ACN58567 and the Mtnin-16 sequence is from this work. The seven blocks of sequence shaded in gray correspond to the six blocks of sequence conserved in NIN and NIN-like proteins and block L that is conserved in NINs, NLP1 and NLP2 (Schauer et al. J Mol Evol (2005) 60:229–237). The ten amino acid residues highlighted in yellow in Mtnin-16 correspond to those encoded by *Tnt1* in the Mtnin-16 hybrid protein. Mtnin-16 contains the first six conserved blocks of sequence found in NIN proteins, but lacks the seventh block corresponding to the PB1 domain that is important for hetero-dimerization.
