# Supplementary material for: Rapid identification of causative insertions underlying Medicago truncatula Tnt1 mutants defective in symbiotic nitrogen fixation from a forward genetic screen by whole genome sequencing
Source: PubMed Central journal article supplement (PMC4769575; doi:10.1186/s12864-016-2452-5), 2016-02-27
Supplement: 12864_2016_2452_MOESM15_ESM.pdf [file 12864_2016_2452_MOESM15_ESM.pdf]

**Additional File 15: Table S11. Sequences of primers used in this study**  
(Veerappan et al. 2015, submitted to BMC Genomics)

| <b>Primer Name</b>                   | <b>Primer sequences (5'-3')</b>                                                                                                                                            | <b>Comments</b>                                              |
|--------------------------------------|----------------------------------------------------------------------------------------------------------------------------------------------------------------------------|--------------------------------------------------------------|
| Medtr5g099060-1F<br>Medtr5g099060-1R | TGCTAATGGTGGTGATGGTAAT<br>GGTTAAATCGCCTTGCAATCTC                                                                                                                           | NF10547 co-segregation analysis genomic primers              |
| Medtr4g085800-1F<br>Medtr4g085800-1R | GCACAATATTTACCGCCTTTGT<br>ACAATGACCTCTTCCCATTCC                                                                                                                            | NF11217 co-segregation analysis genomic primers              |
| <i>Tnt1</i> -F1<br><i>Tnt1</i> -R1   | TCCTTGTTGGATTGGTAGCCAACCTTG<br>TTG<br>TGTAGCACCGAGATACGGTAATTAAC<br>AAGA                                                                                                   | <i>Tnt1</i> primers for used for co-segregation analysis     |
| AD1<br>AD2<br>AD3<br>AD5<br>AD6      | NTCGA(G/C)T(A/T)T(G/C)G(A/T)GTT<br>NGTCGA(G/C)(A/T)GANA(A/T)GAA<br>(A/T)GTGNAG(A/T)ANCANAGA<br>(G/C)(G/C)TGG(G/C)STANAT(A/T)AT(A/T)CT<br>CG(G/C)AT(G/C)TC(G/C)AANAA(A/T)AT | Arbitrary degenerate (AD) primers used in TAIL-PCR reactions |
| <i>Tnt1</i> -F<br><i>Tnt1</i> -R     | ACAGTGCTACCTCCTCTGGATG<br>CAGTGAACGAGCAGAACCTGTG                                                                                                                           | <i>Tnt1</i> primers used in TAIL-PCR reactions               |
